# Supplementary material
Source: PubMed Central journal article supplement (PMC3733379)
Supplement: NIHMS488440-supplement-1_si_001.pdf [file NIHMS488440-supplement-1_si_001.pdf]

## **Supporting Information**

Targeted quantification of low ng/mL level proteins in human serum without immunoaffinity depletion

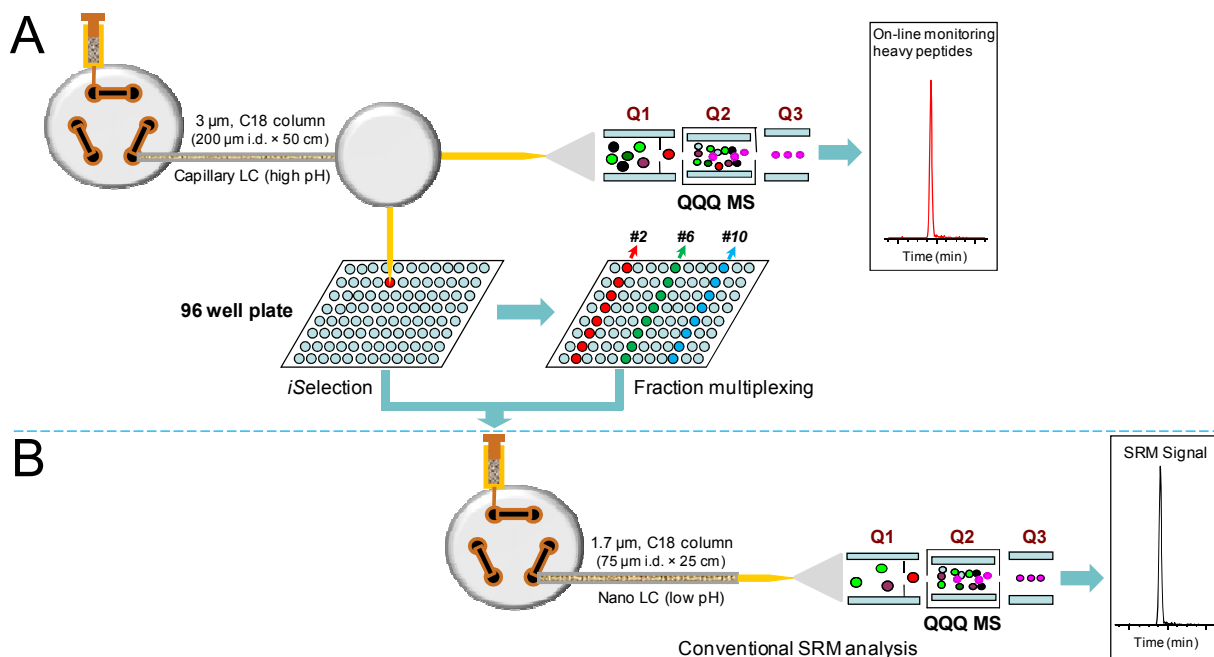

**Figure S1.** Schematic diagram of the PRISM-SRM workflow. **(A)** PRISM workflow.  $\sim 20 \mu\text{g}$  peptide sample spiked with internal standard (IS) heavy peptides was injected and separated by a high resolution reversed-phase cLC system using high pH mobile phases. The eluent from the cLC column at a flow rate of  $3.3 \mu\text{L}/\text{min}$  was split into two flowing streams via a Tee union (the split ratio of flow rates is 1:10): a small fraction (9%) of the column eluent went to a triple quadrupole mass spectrometer for on-line SRM monitoring IS peptides; a large fraction (91%) of the column eluent was automatically collected every minute into a 96-well plate during a  $\sim 100$ -min LC run. The specific target peptide fractions were either selected based on the same elution times of IS being monitored by the on-line SRM (*i*Selection) or multiplexed. For example, 96 fractions collected along with the first dimensional LC separation can be multiplexed into 12 fractions by combining 8 fractions from the first dimensional LC separation into one fraction for downstream LC-SRM analyses, such as pooling fractions 2, 14, 26, 38, 50, 62, 74, and 86 (marked in red color) into one sample (#2) for the second dimensional LC-SRM. **(B)** Conventional LC-SRM workflow. Following *i*Selection, a target peptide fraction was either directly subjected to nanoLC-SRM with  $4 \mu\text{L}$  sample per injection ( $\sim 45 \text{ ng}$  peptides on nanoLC column) or multiplexed with other target fractions with a final volume of  $20 \mu\text{L}$  prior to nanoLC-SRM analysis.

**A**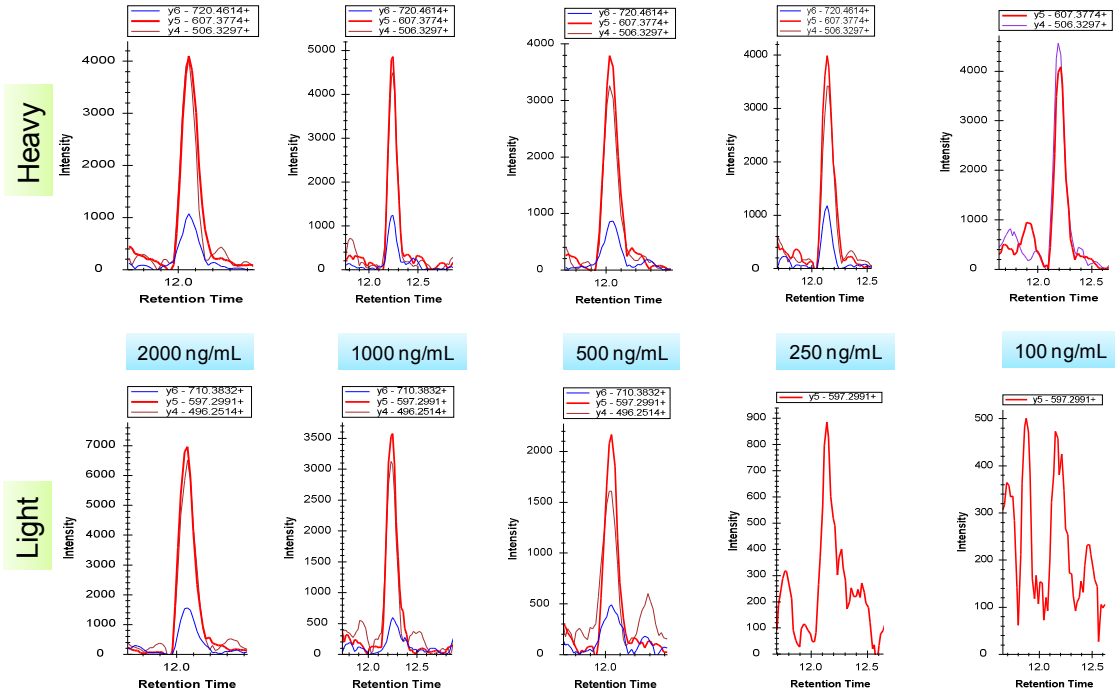**B**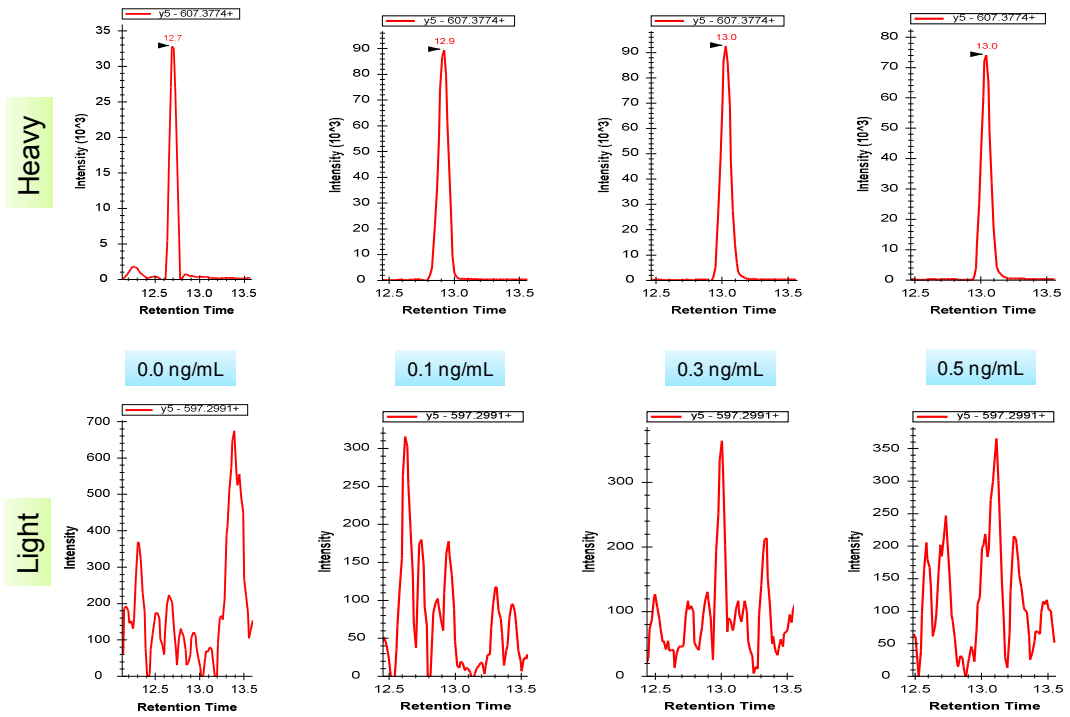

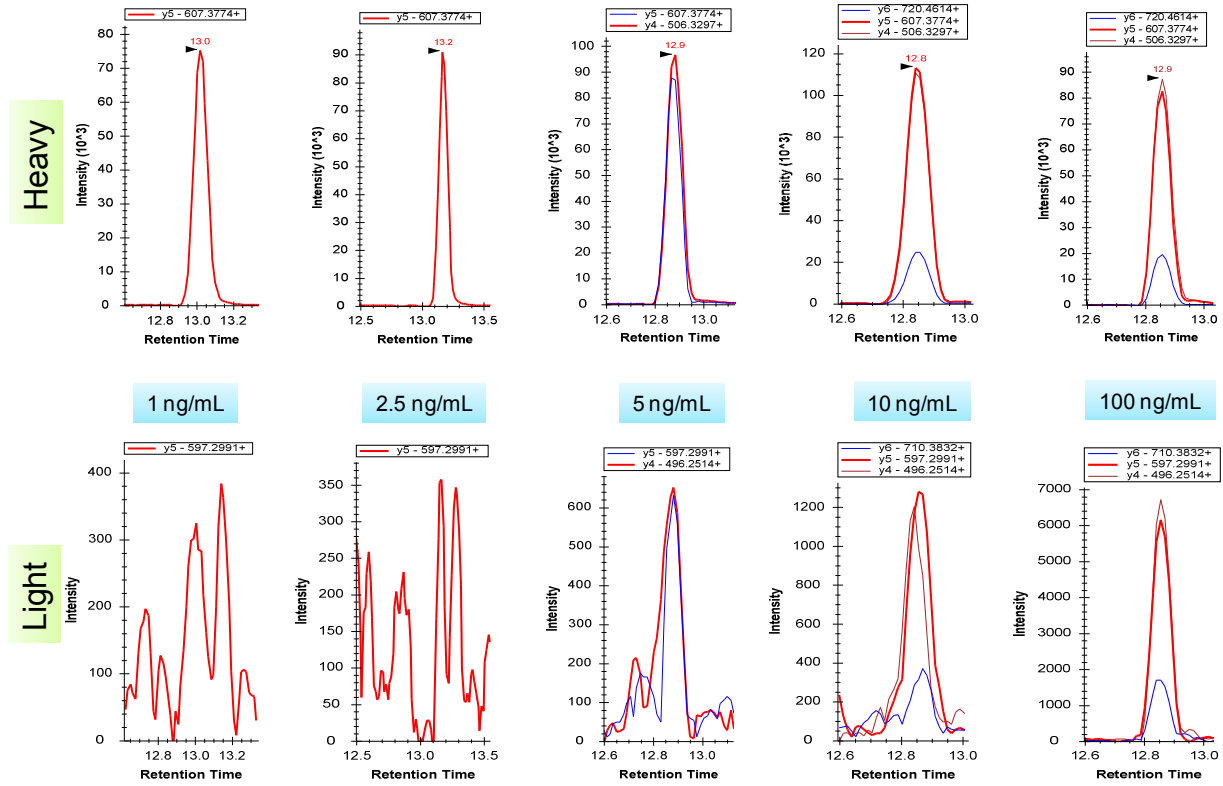

**Figure S2.1.** Extracted ion chromatograms of transitions monitored for DGPLTGTyr derived from bovine carbonic anhydrase. **(A)** Direct LC-SRM. **(B)** PRISM-SRM. Internal standards were spiked at 0.5 fmol/ $\mu$ L.

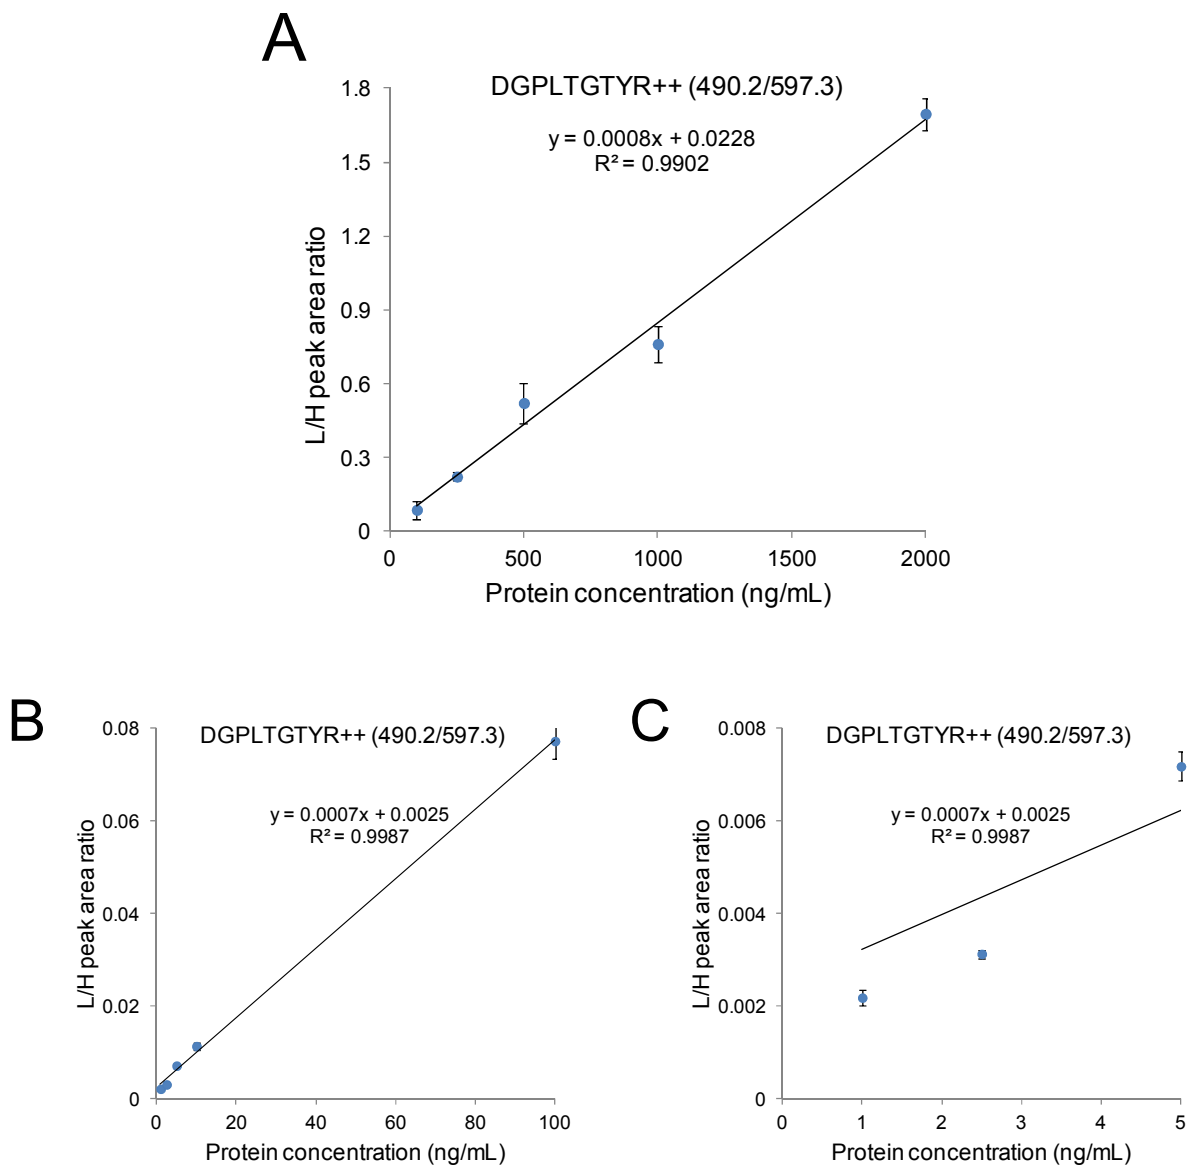

**Figure S2.2.** Calibration curves for quantifying bovine carbonic anhydrase. **(A)** Direct LC-SRM; **(B)** PRISM-SRM (target protein: 0-100 ng/mL); **(C)** PRISM-SRM (Zoom-in range of 0-5 ng/mL).

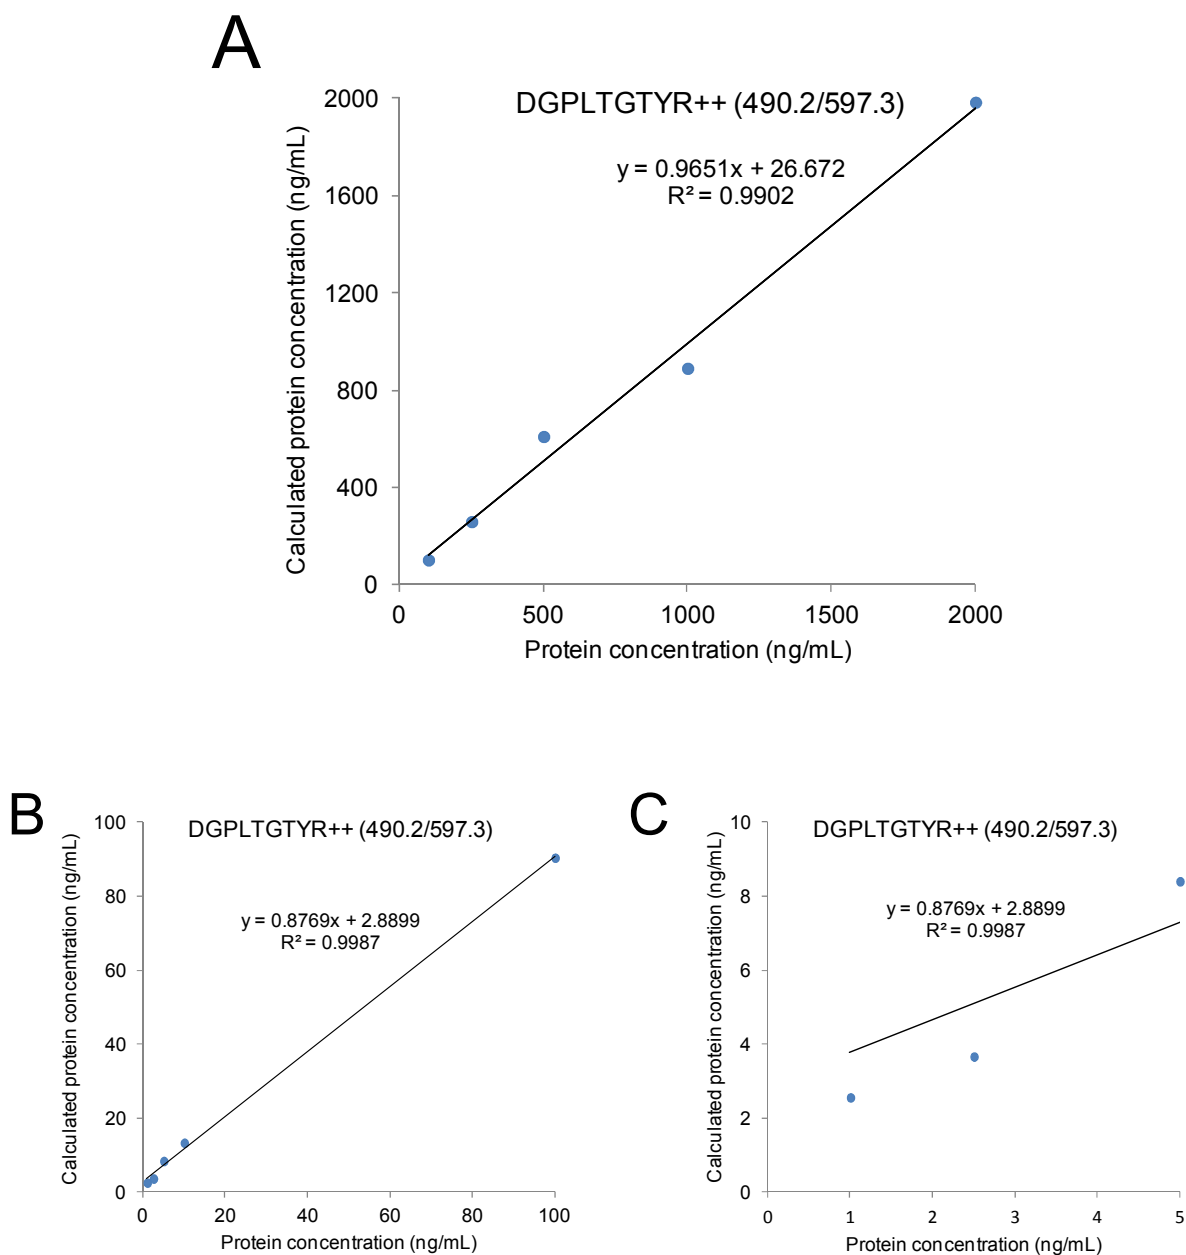

**Figure S2.3.** Correlation curves for quantifying bovine carbonic anhydrase. **(A) Direct LC-SRM.** Target protein concentrations at the range of 100-2000 ng/mL. **(B) PRISM-SRM.** Target protein concentrations at the range of 0-100 ng/mL. **(C) PRISM-SRM (Zoom-in range of 0-5 ng/mL).**

**A**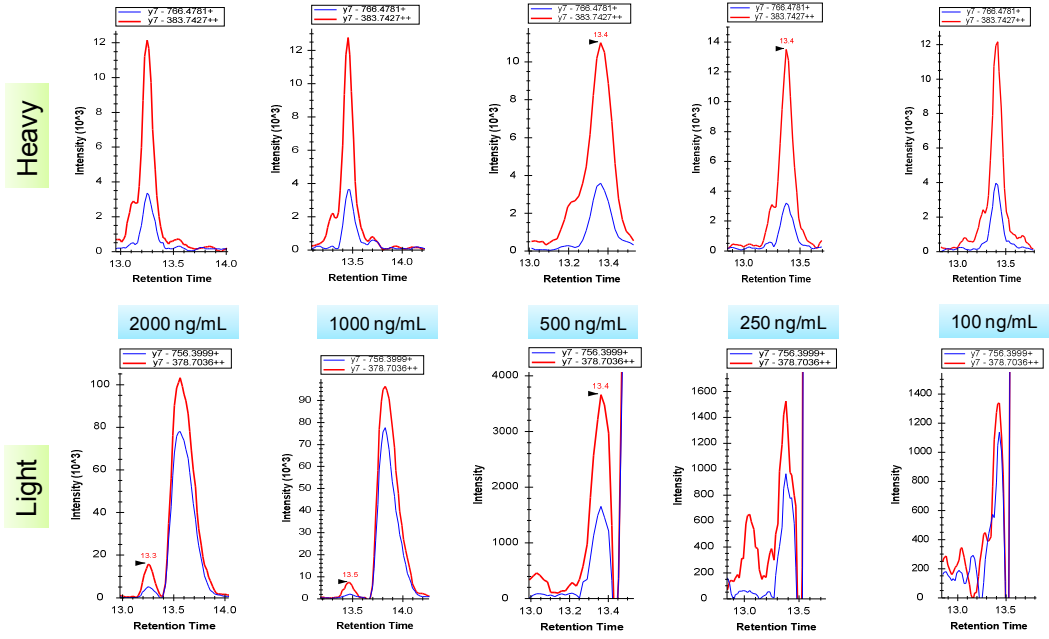**B**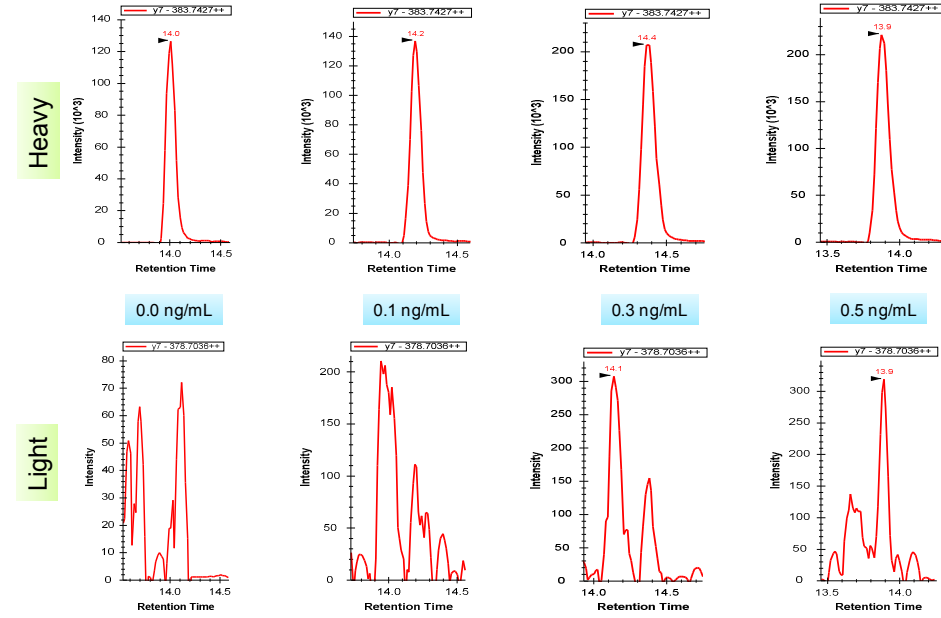

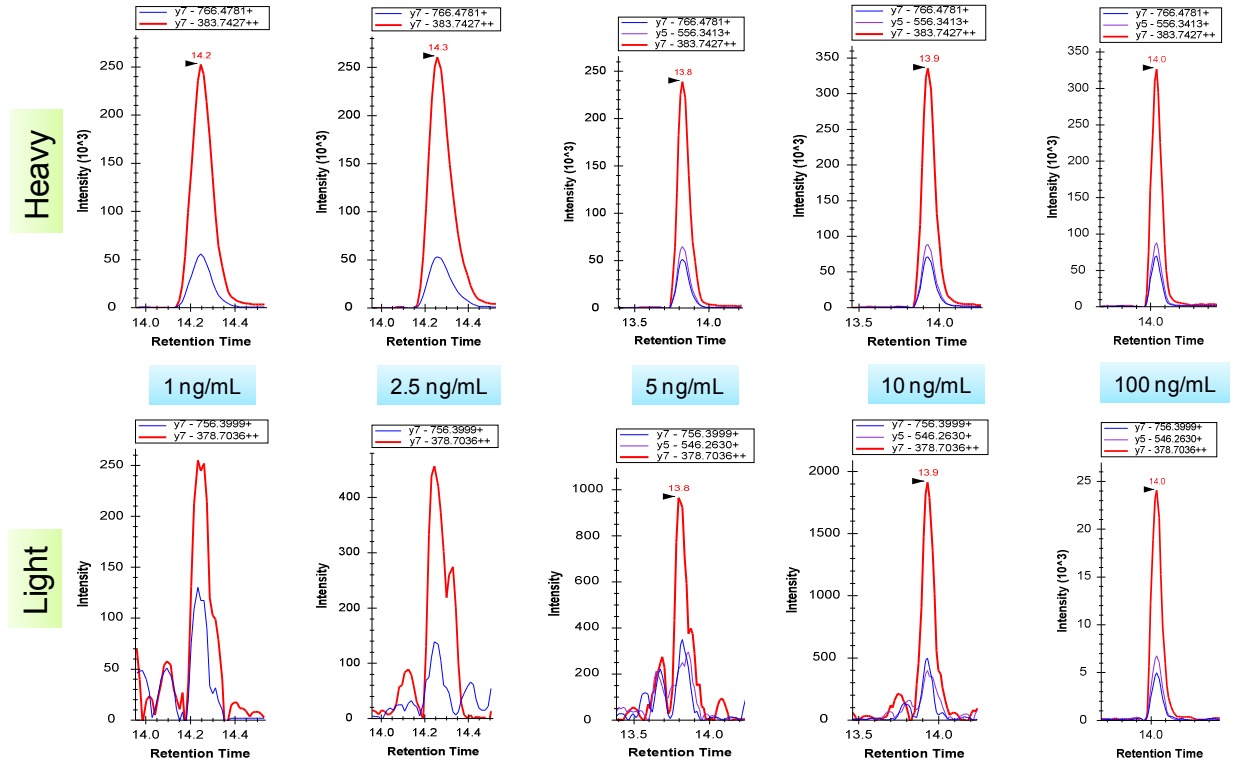

**Figure S3.1.** Extracted ion chromatograms of transitions monitored for DFPIANGER derived from bovine carbonic anhydrase. (A) Direct LC-SRM. (B) Direct PRISM-SRM. Internal standards were spiked at 0.5 fmol/ $\mu$ L.



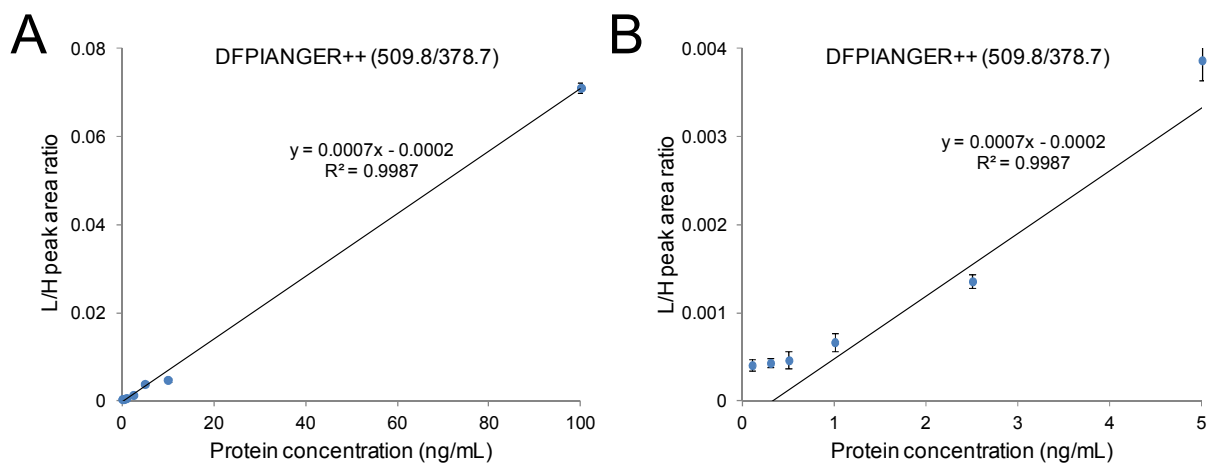

**Figure S3.2.** Calibration curves for quantifying bovine carbonic anhydrase. **(A)** PRISM-SRM (target protein: 0-100 ng/mL); **(B)** PRISM-SRM (Zoom-in range of 0-5 ng/mL).

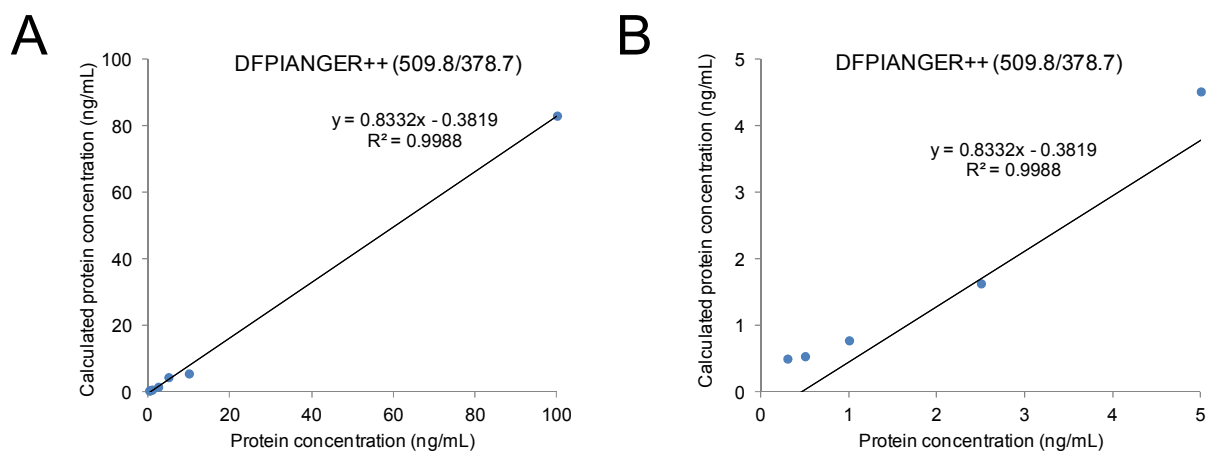

**Figure S3.3.** Correlation curves for quantifying bovine carbonic anhydrase. **(A)** PRISM-SRM. Target protein concentrations at the range of 0-100 ng/mL. **(B)** PRISM-SRM (Zoom-in range of 0-5 ng/mL).

**A**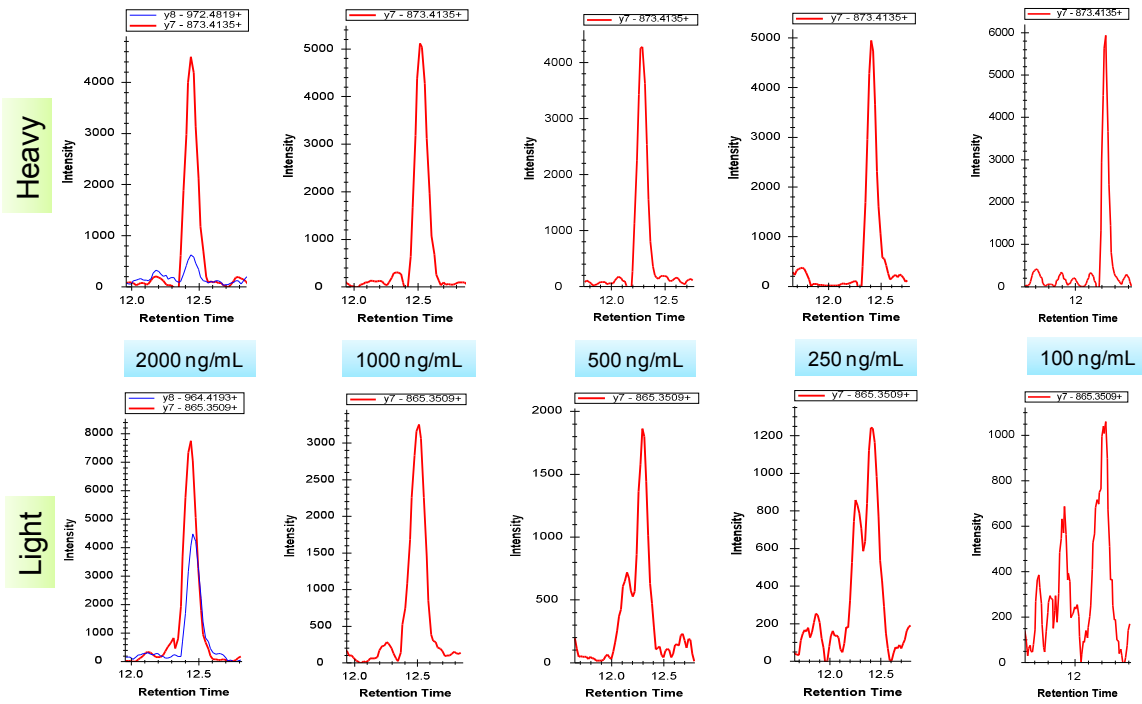**B**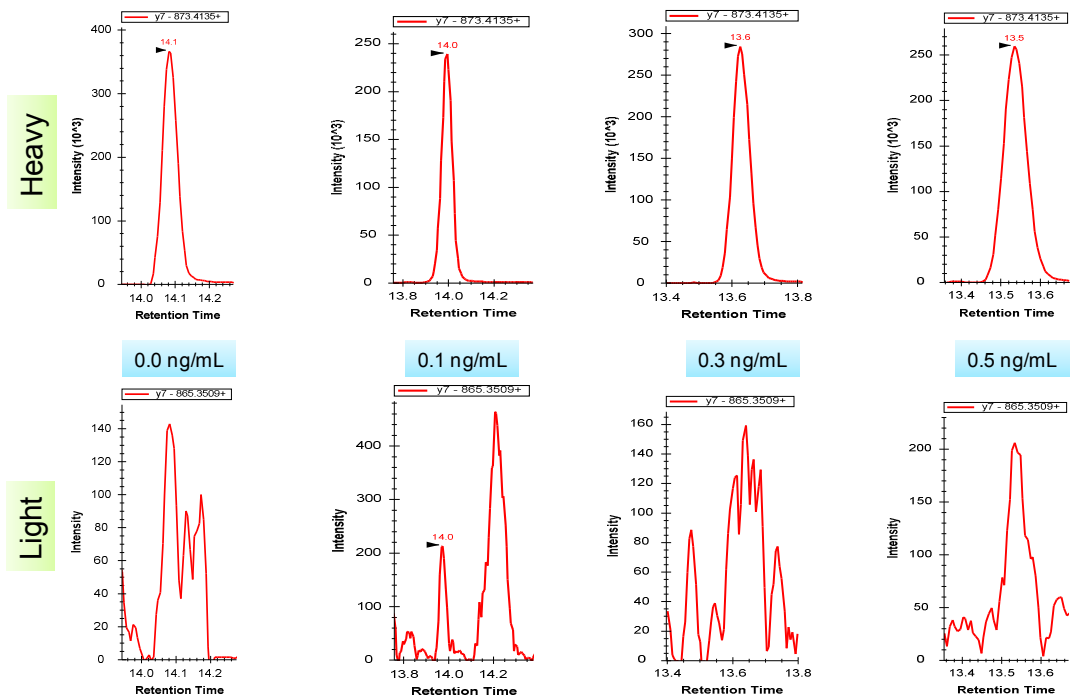

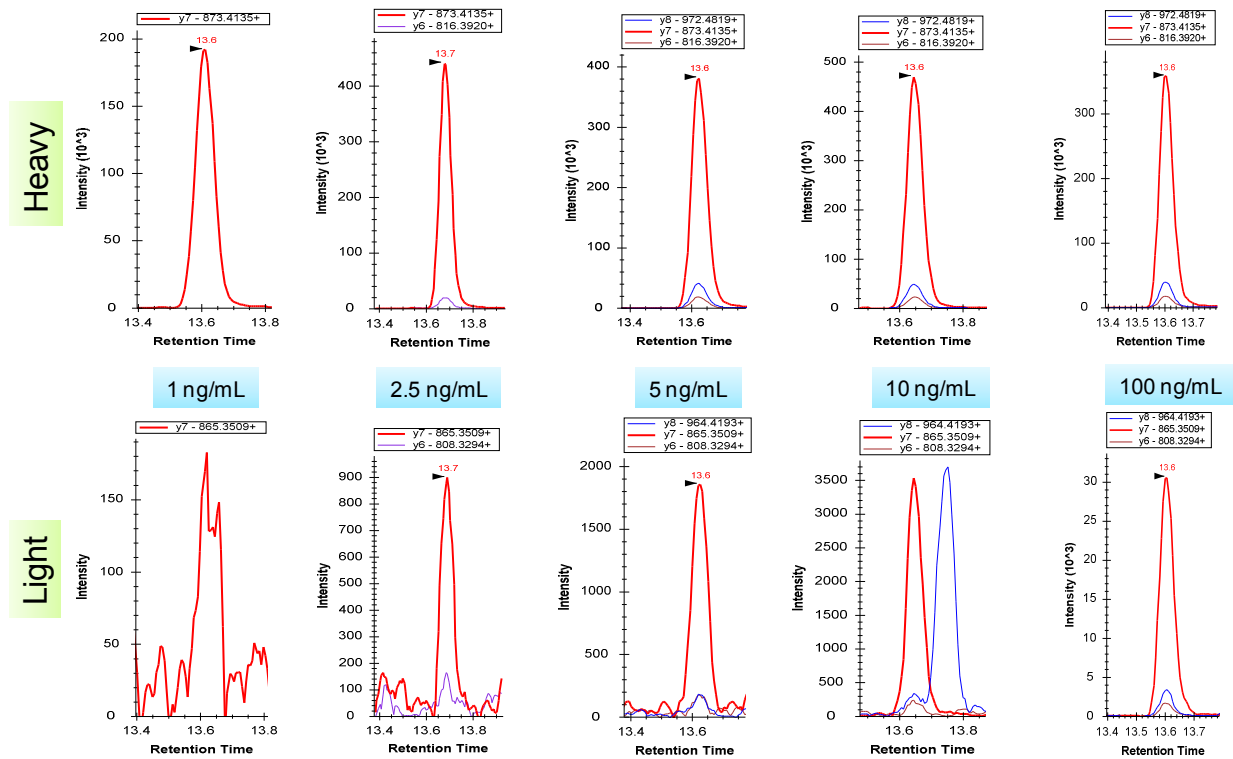

**Figure S4.1.** Extracted ion chromatograms of transitions monitored for IVGGWEC<sub>cam</sub>EK derived from prostate-specific antigen. **(A)** Direct LC-SRM. **(B)** Direct PRISM-SRM. Internal standards were spiked at 0.5 fmol/ $\mu$ L.

**A**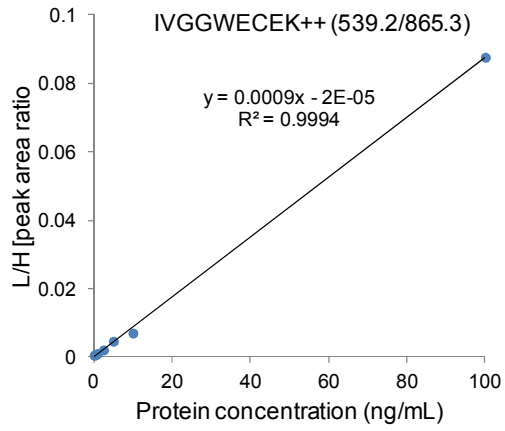**B**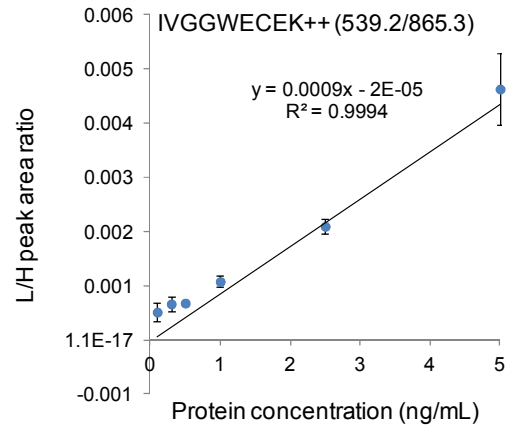

**Figure S4.2.** Calibration curves for quantifying prostate-specific antigen. **(A)** PRISM-SRM (target protein: 0-100 ng/mL); **(B)** PRISM-SRM (Zoom-in range of 0-5 ng/mL).

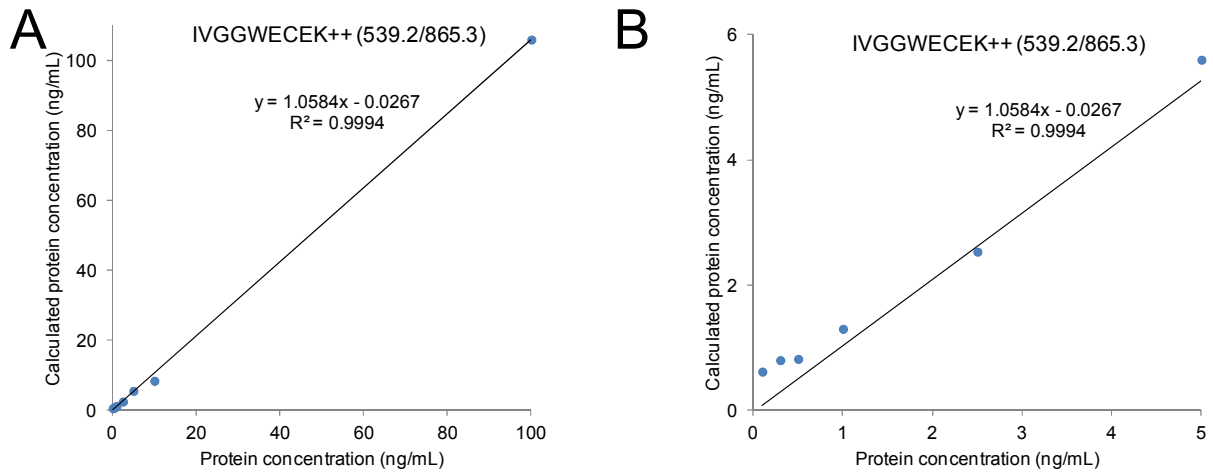

**Figure S4.3.** Correlation curves for quantifying prostate-specific antigen. **(A) PRISM-SRM.** Target protein concentrations at the range of 0-100 ng/mL. **(B) PRISM-SRM (Zoom-in range of 0-5 ng/mL).**

**A**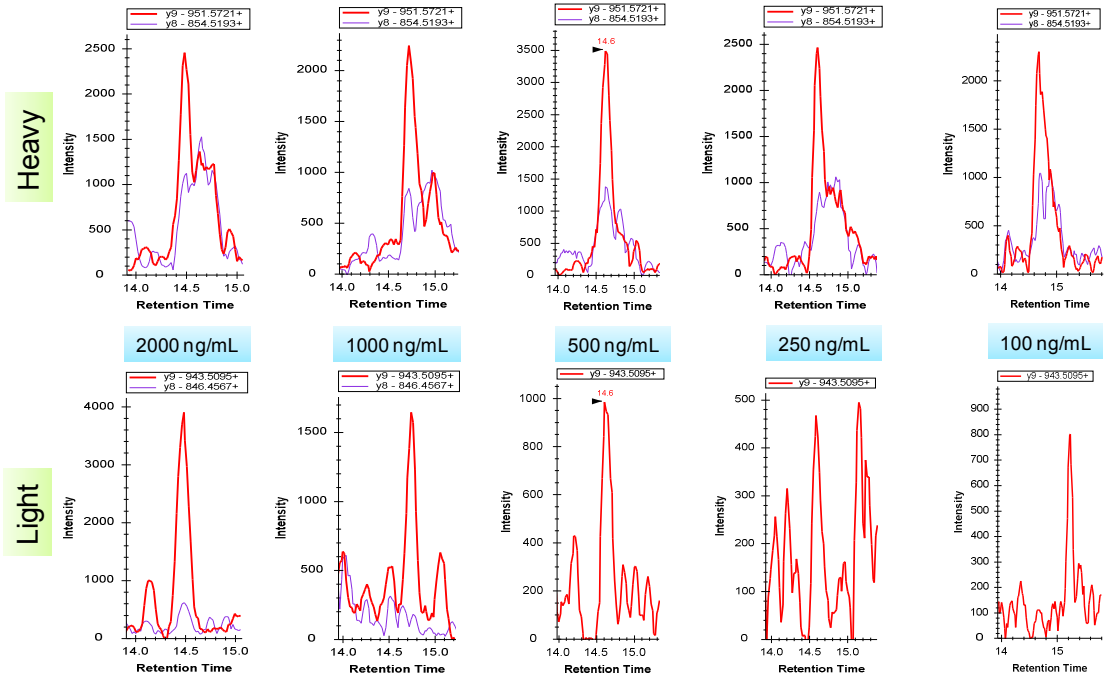**B**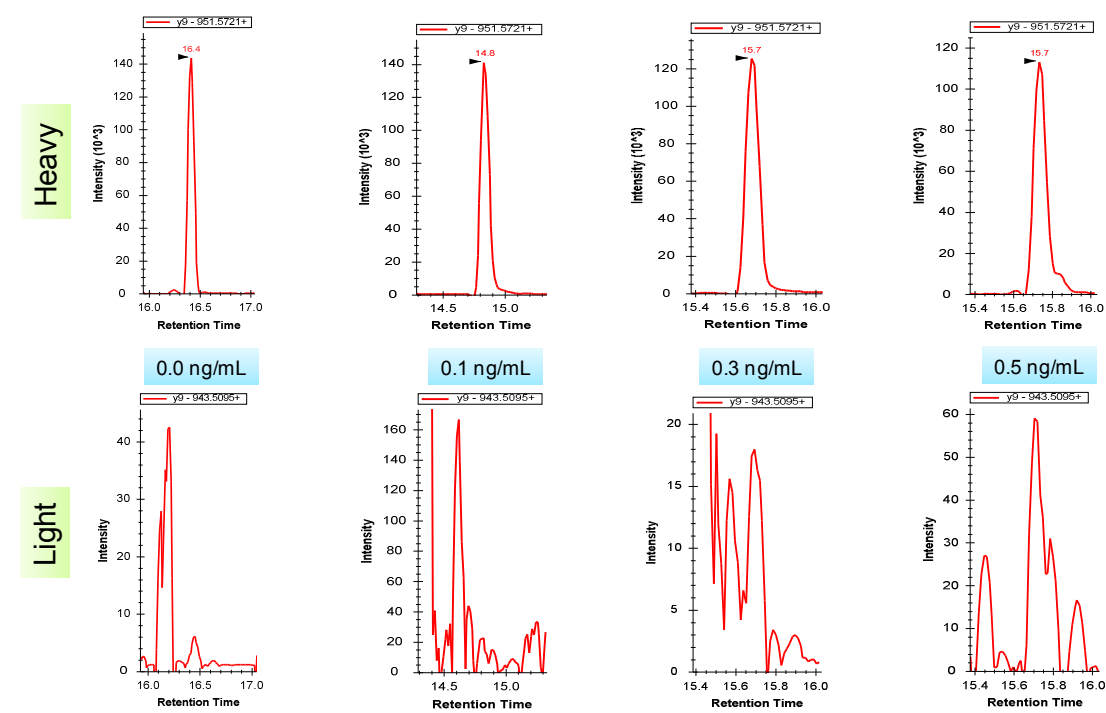

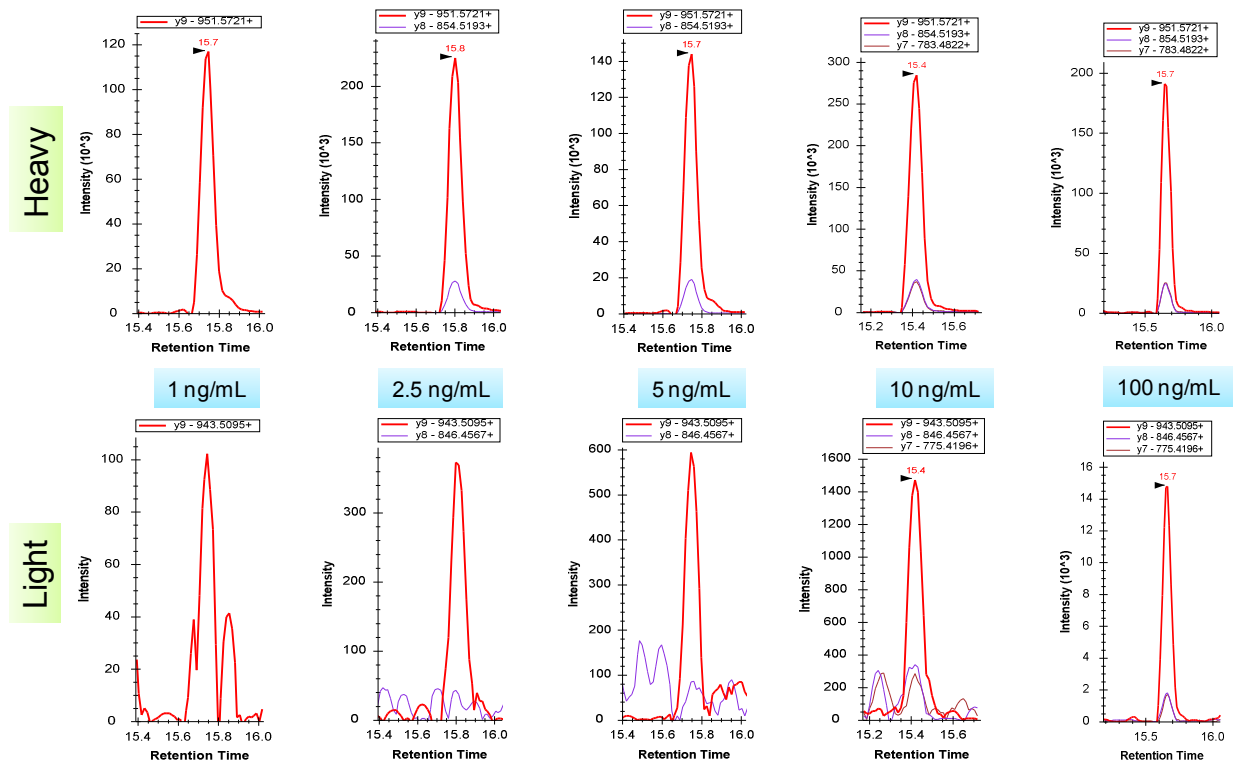

**Figure S5.1.** Extracted ion chromatograms of transitions monitored for LSEPAELTDAVK derived from prostate-specific antigen. **(A)** Direct LC-SRM. **(B)** Direct PRISM-SRM. Internal standards were spiked at 0.5 fmol/ $\mu$ L.



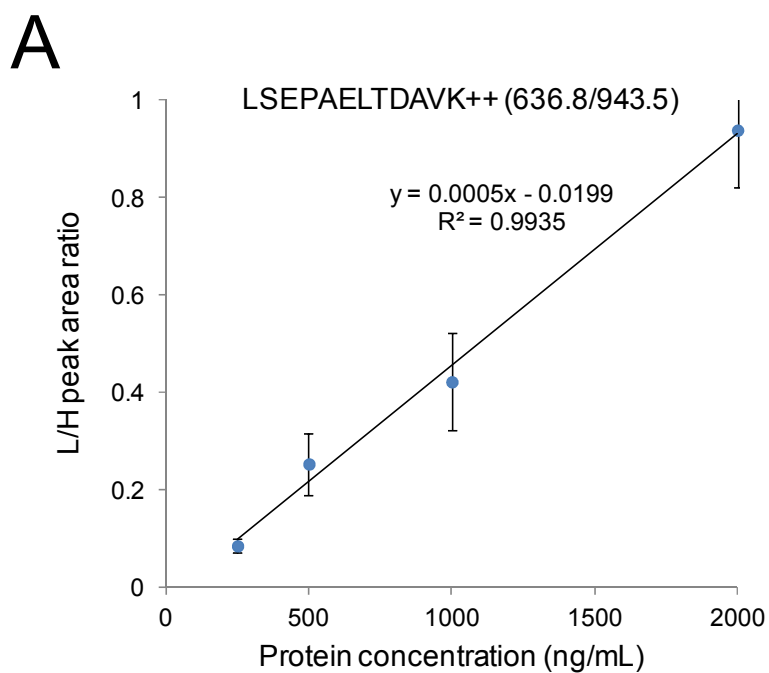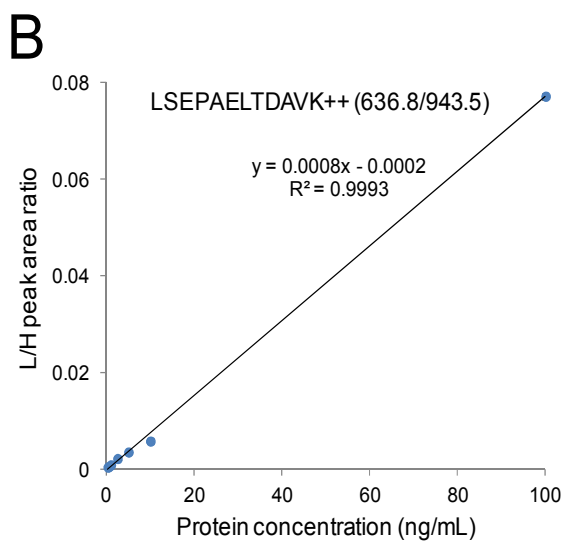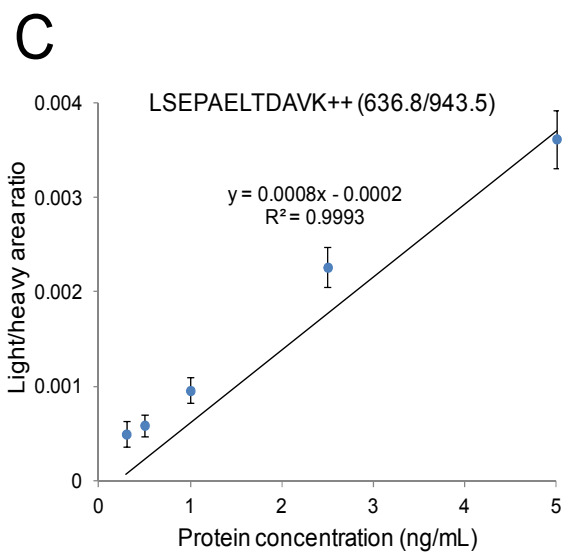

**Figure S5.2.** Calibration curves for quantifying prostate-specific antigen. **(A)** Direct LC-SRM; **(B)** PRISM-SRM (target protein: 0-100 ng/mL); **(C)** PRISM-SRM (Zoom-in range of 0-5 ng/mL).

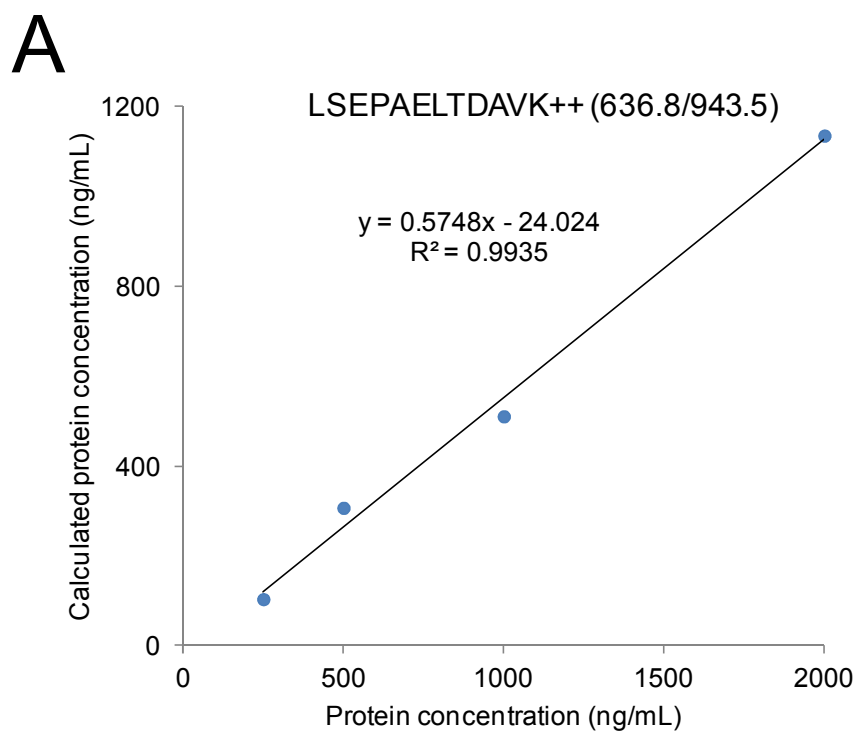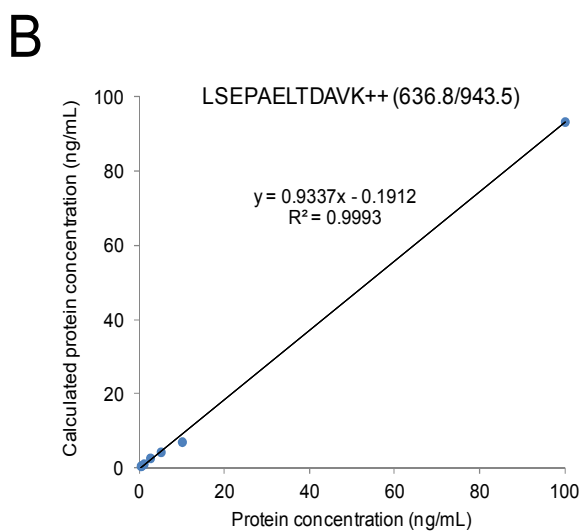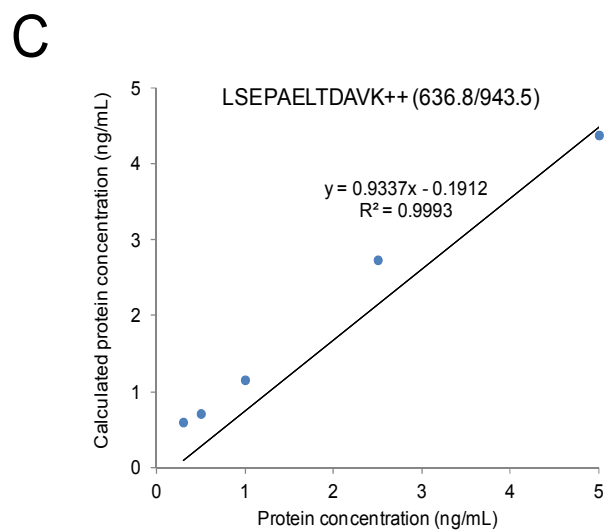

**Figure S5.3.** Correlation curves for quantifying prostate-specific antigen. **(A) Direct LC-SRM.** Target protein concentrations at the range of 100-2000 ng/mL. **(B) PRISM-SRM.** Target protein concentrations at the range of 0-100 ng/mL. **(C) PRISM-SRM (Zoom-in range of 0-5 ng/mL).**

**A**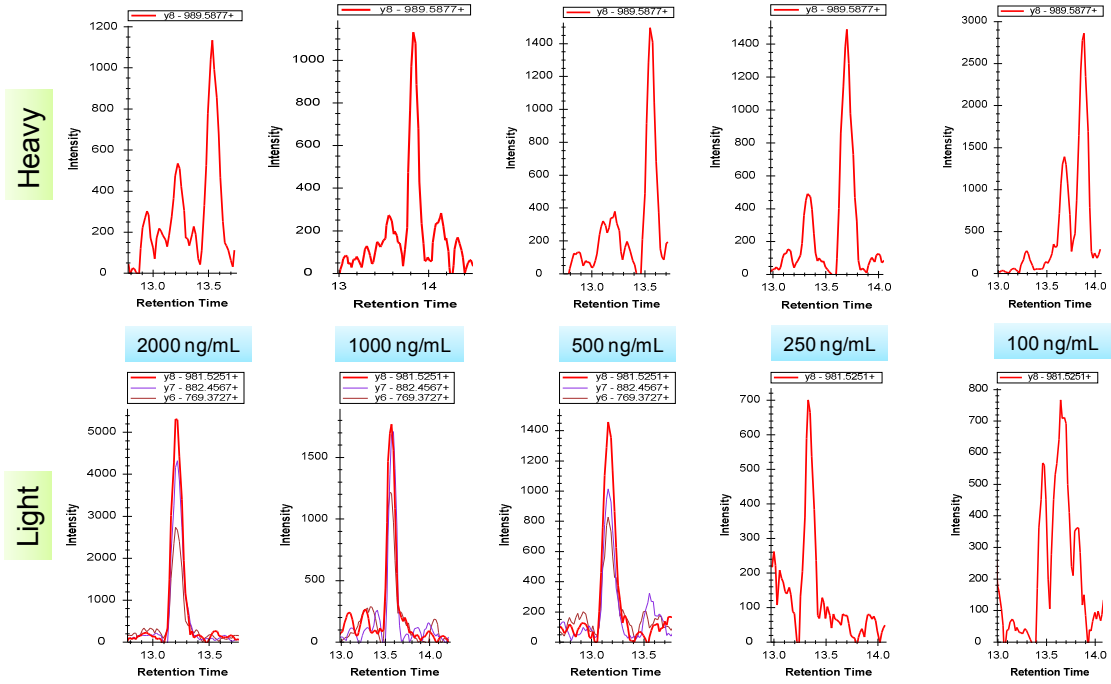**B**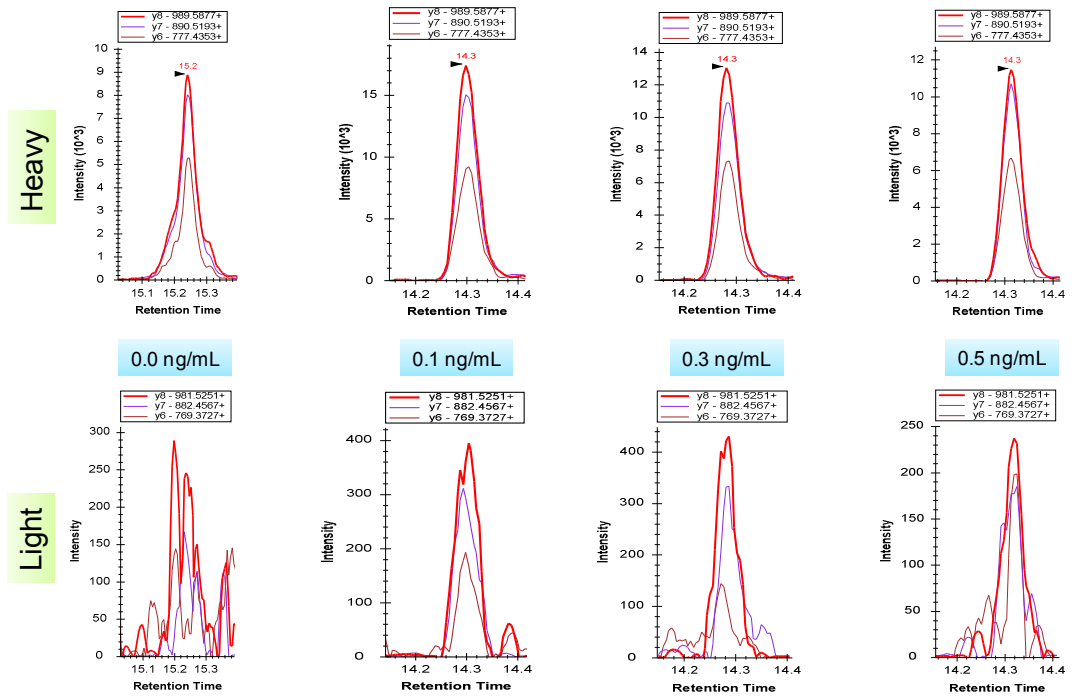

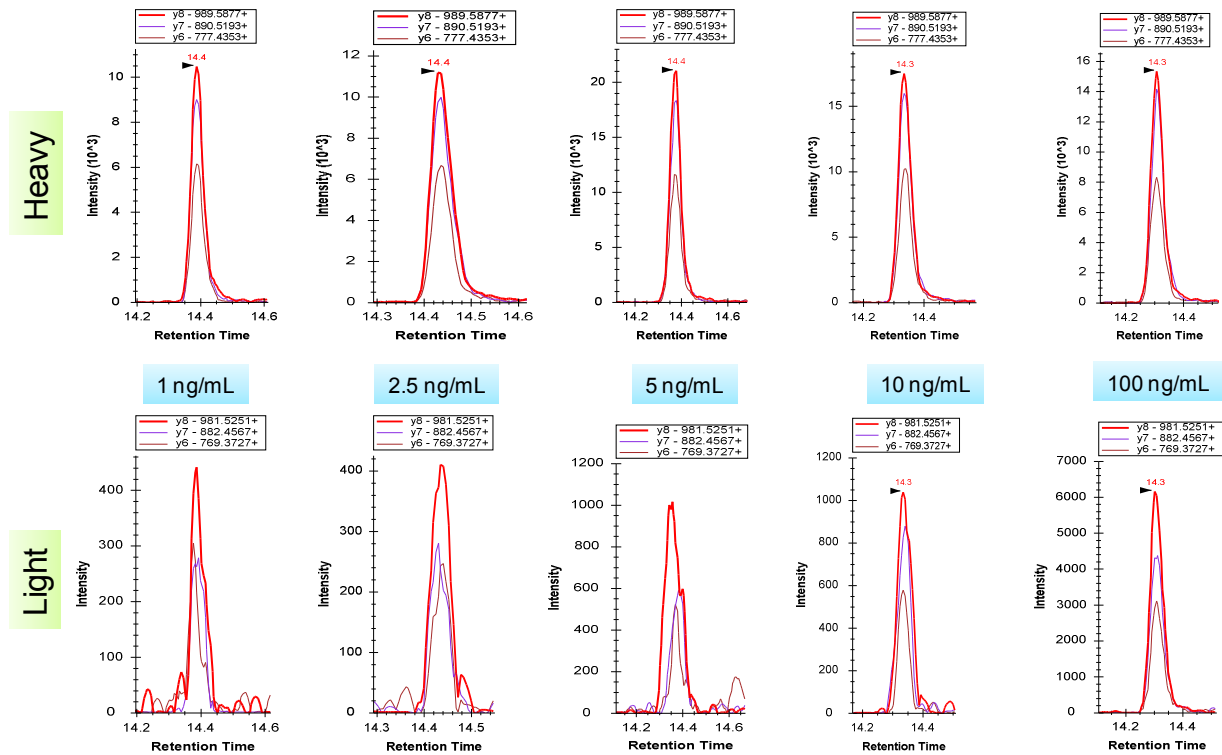

**Figure S6.1.** Extracted ion chromatograms of transitions monitored for VLVLDTDYKK derived from bovine beta-lactoglobulin. **(A)** Direct LC-SRM. **(B)** Direct PRISM-SRM. Internal standards were spiked at 0.5 fmol/ $\mu$ L.

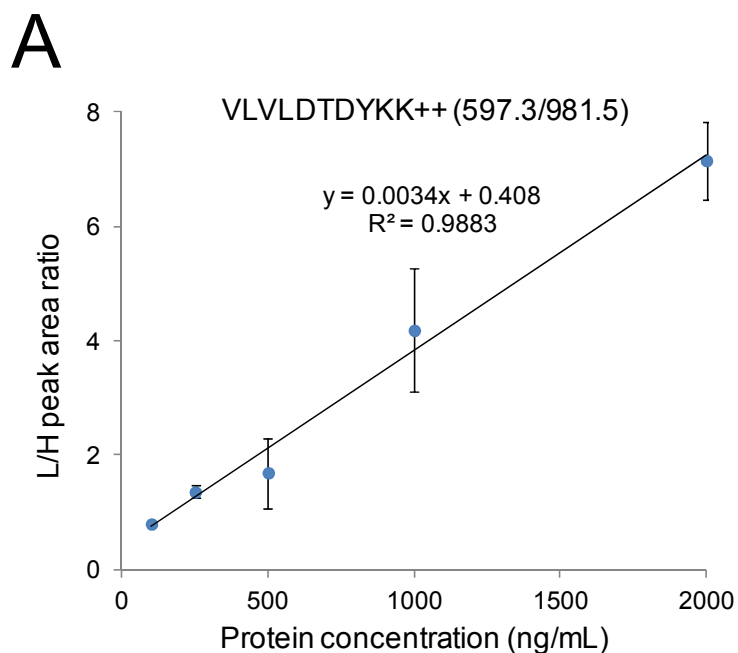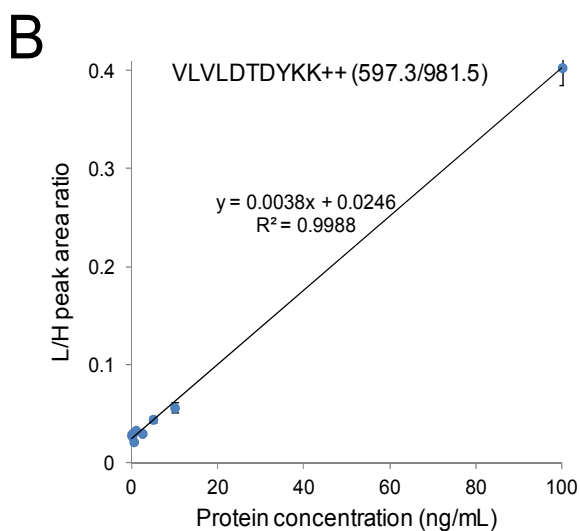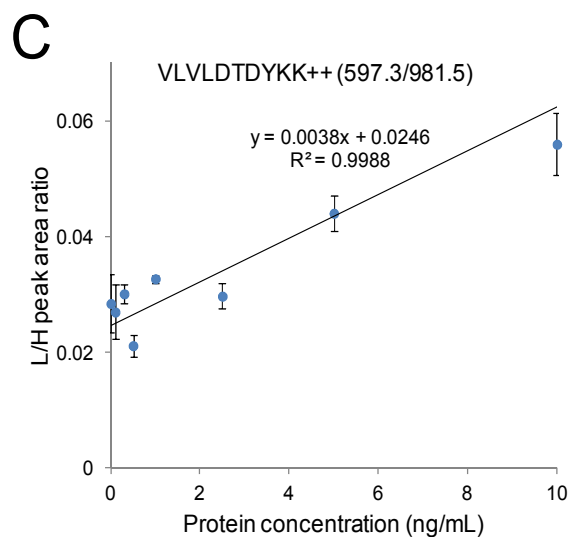

**Figure S6.2.** Calibration curves for quantifying bovine beta-lactoglobulin. **(A)** Direct LC-SRM; **(B)** PRISM-SRM (target protein: 0-100 ng/mL); **(C)** PRISM-SRM (Zoom-in range of 0-5 ng/mL).

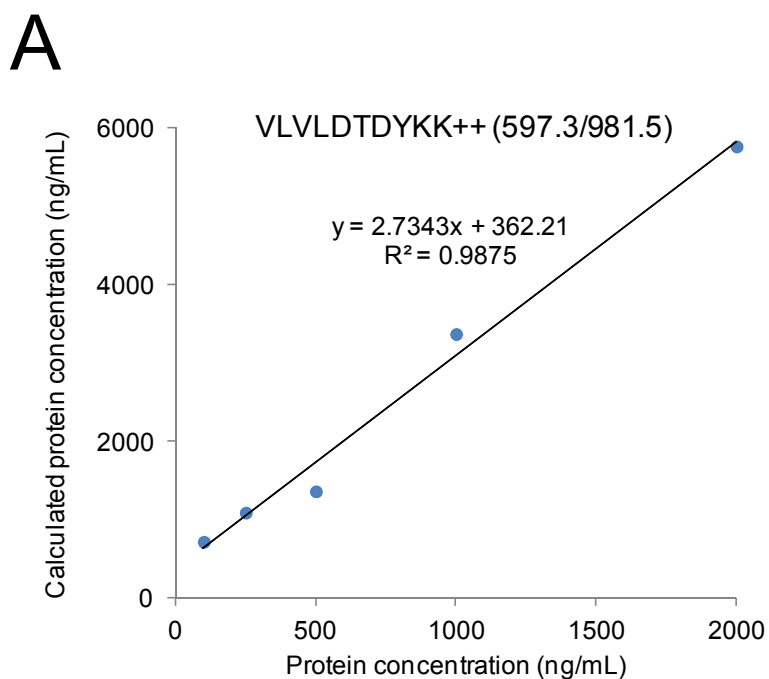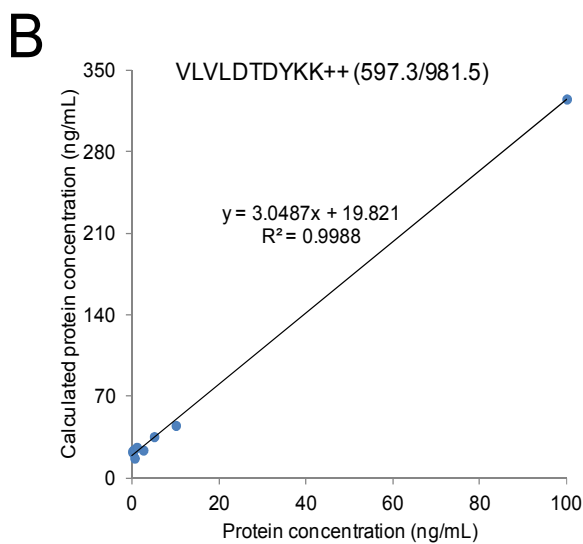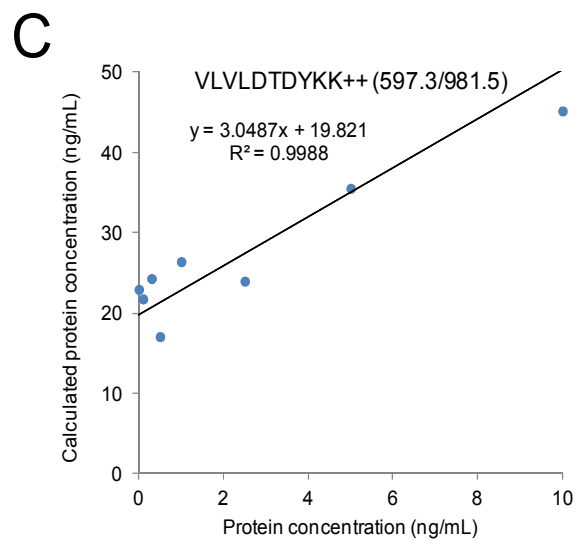

**Figure S6.3.** Correlation curves for quantifying bovine beta-lactoglobulin. **(A) Direct LC-SRM.** Target protein concentrations at the range of 100-2000 ng/mL. **(B) PRISM-SRM.** Target protein concentrations at the range of 0-100 ng/mL. **(C) PRISM-SRM.** Zoom-in range of 0-5 ng/mL.

**A**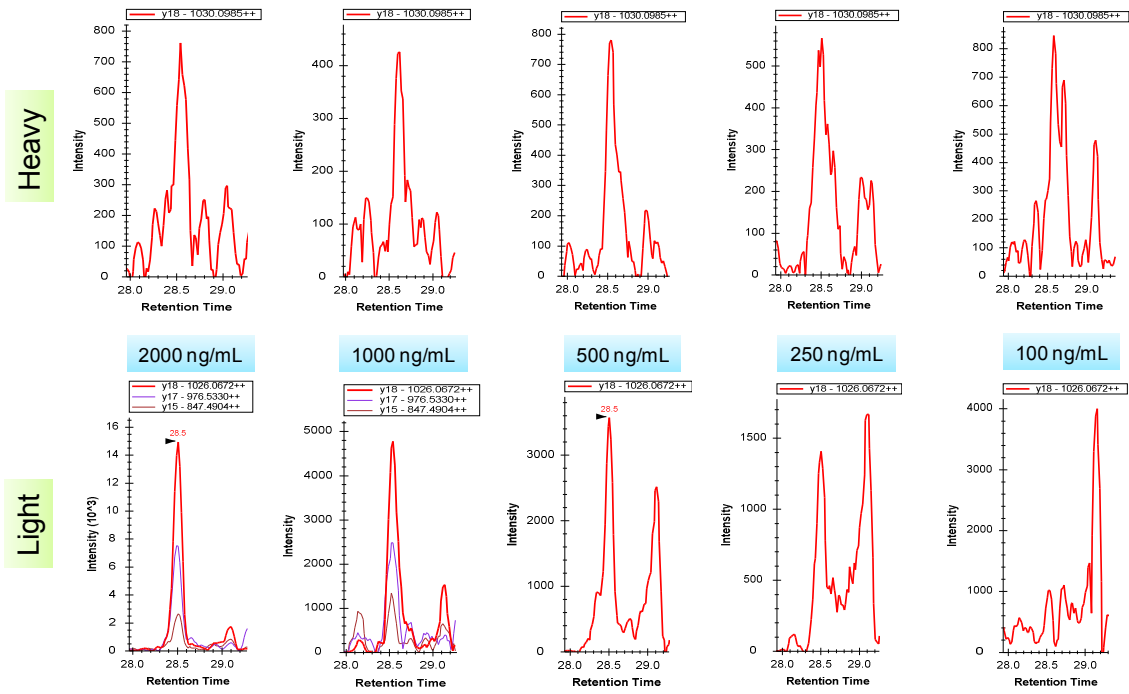**B**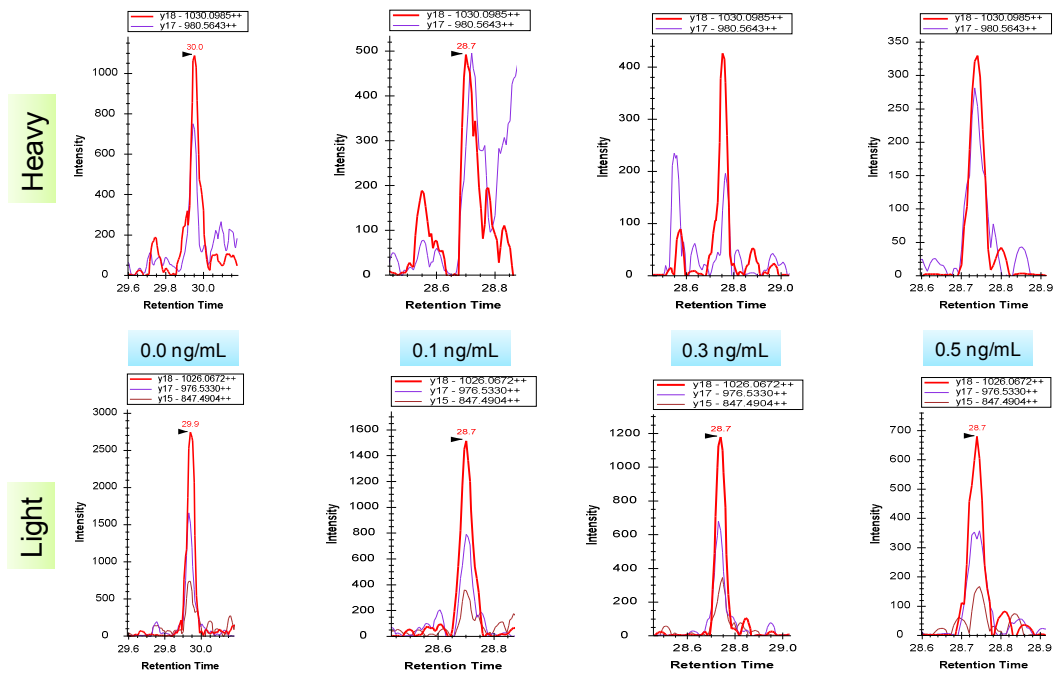

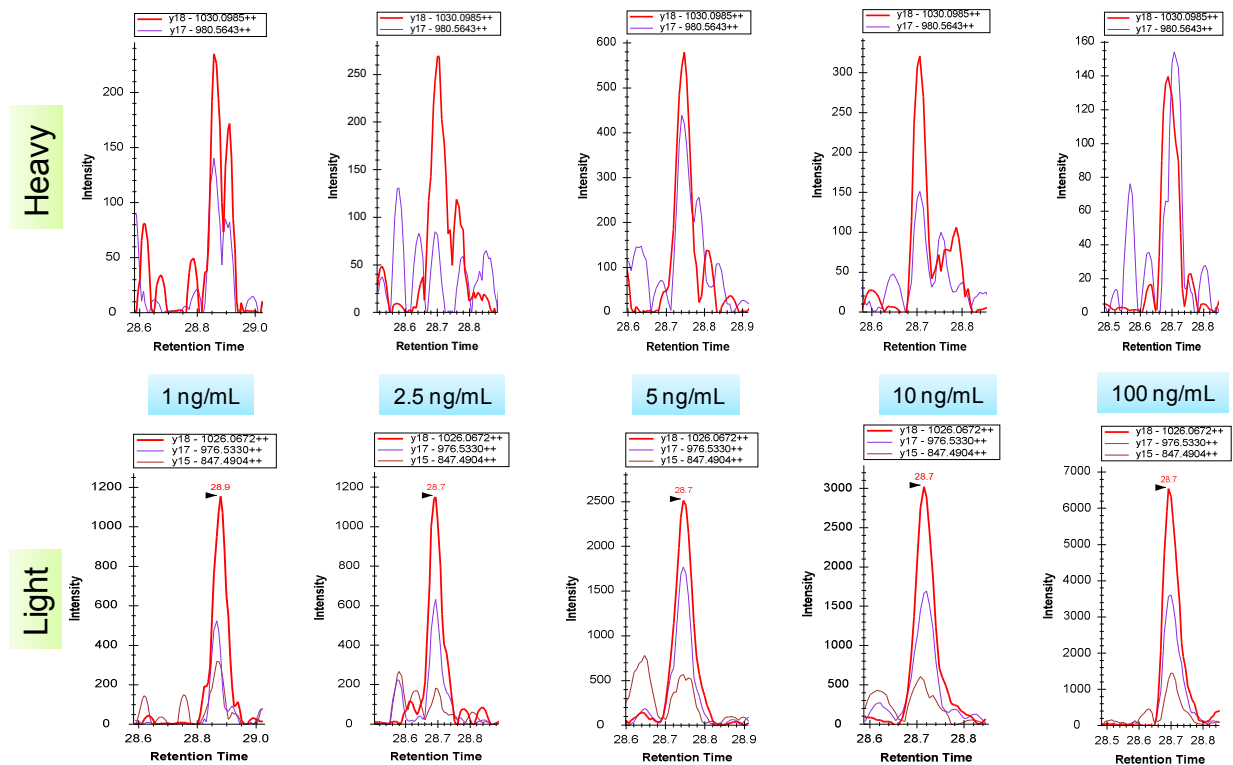

**Figure S7.1.** Extracted ion chromatograms of transitions monitored for VYVEELKPTPEGDLEILLQK derived from bovine beta-lactoglobulin. **(A)** Direct LC-SRM. **(B)** Direct PRISM-SRM. Internal standards were spiked at 0.5 fmol/ $\mu$ L.



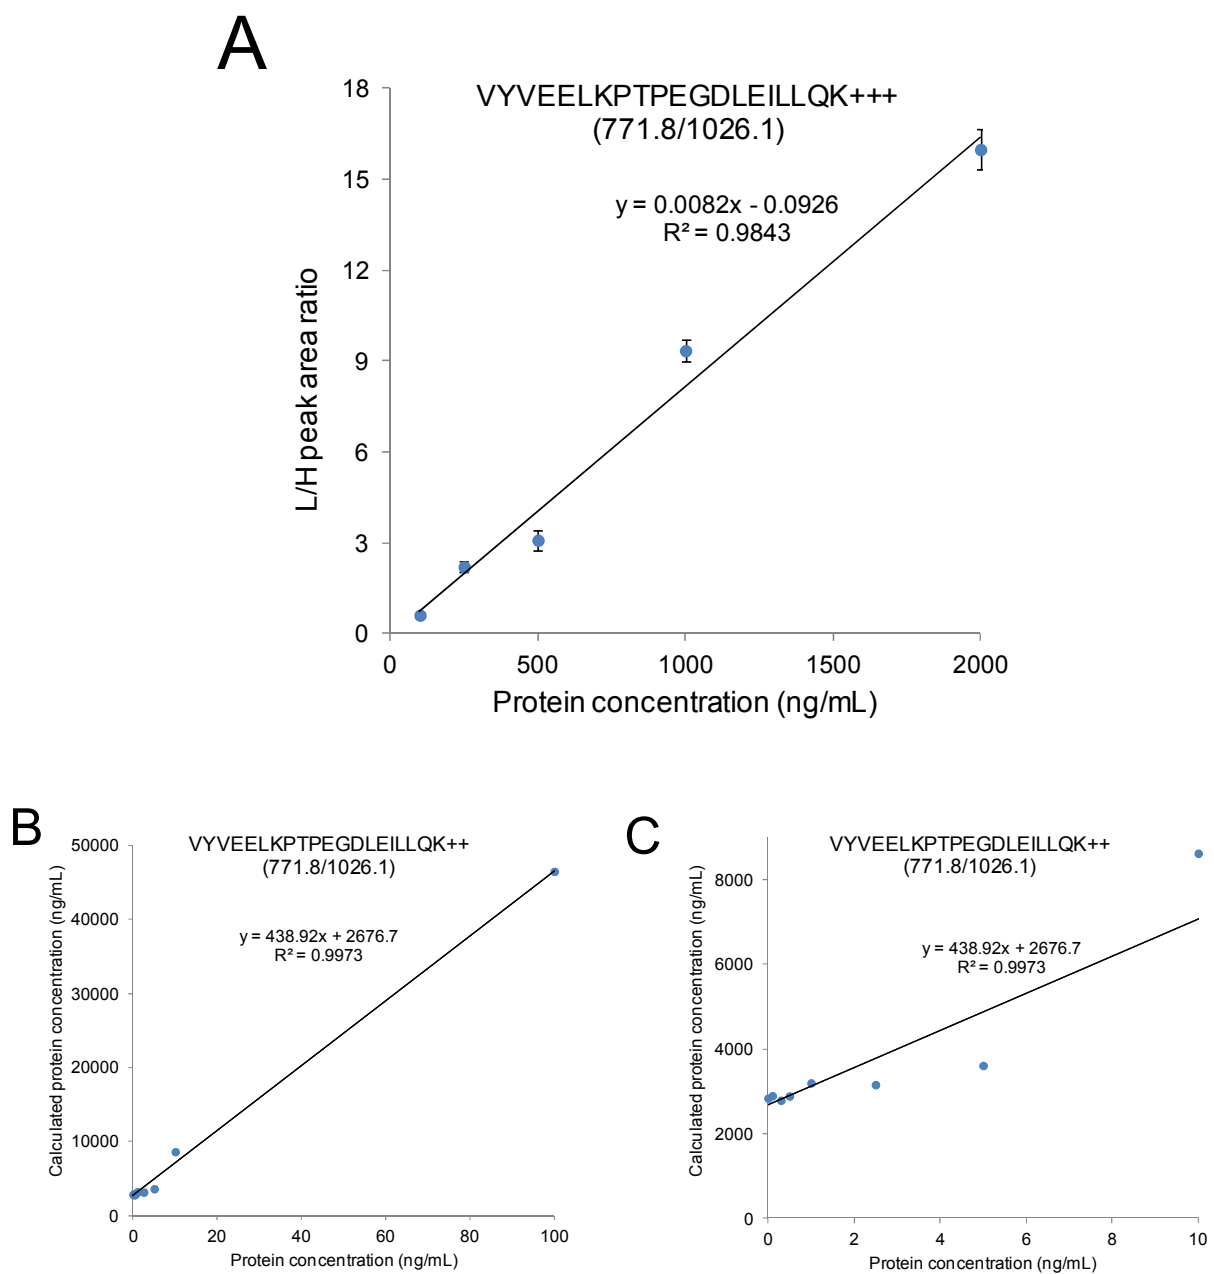

**Figure S7.2.** Calibration curves for quantifying bovine beta-lactoglobulin. **(A)** Direct LC-SRM; **(B)** PRISM-SRM (target protein: 0-100 ng/mL); **(C)** PRISM-SRM (Zoom-in range of 0-5 ng/mL).

**A**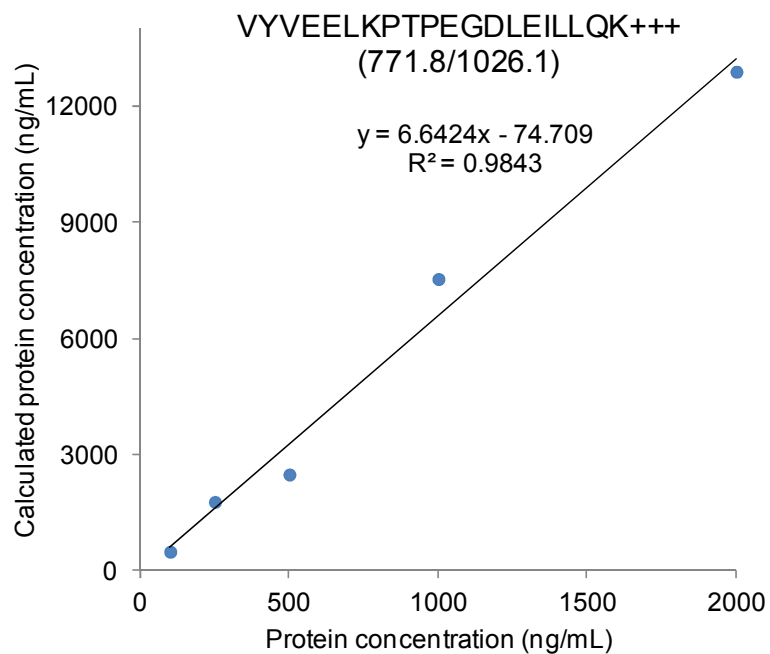**B**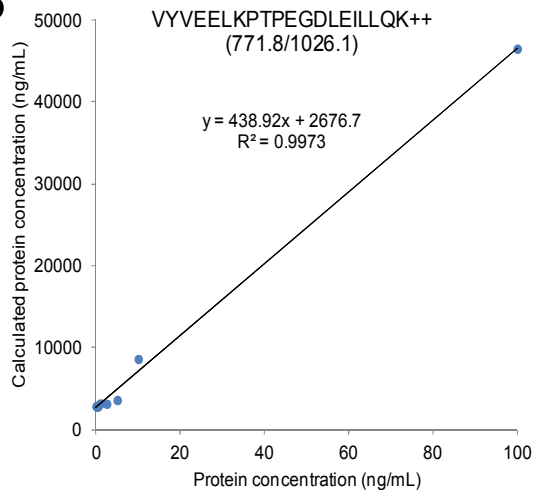**C**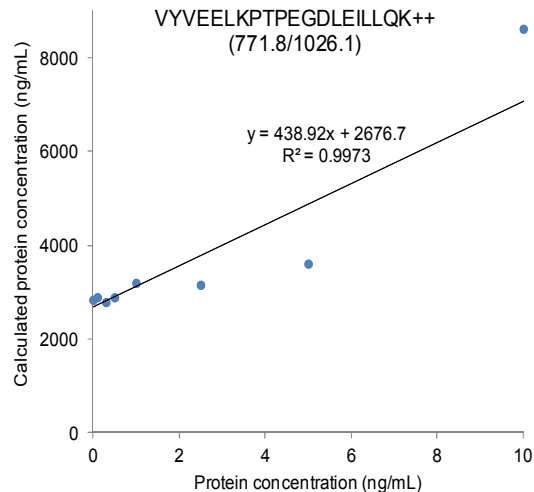

**Figure S7.3.** Correlation curves for quantifying bovine beta-lactoglobulin. **(A) Direct LC-SRM.** Target protein concentrations at the range of 100-2000 ng/mL. **(B) PRISM-SRM.** Target protein concentrations at the range of 0-100 ng/mL. **(C) PRISM-SRM (Zoom-in range of 0-5 ng/mL).**

**Table S1.** Quantitative SRM measurements of 3 target proteins in human female serum with direct LC-SRM. For each concentration point SRM measurements were performed in triplicate.

| Target protein                  | Surrogate peptide                      | Transition   | Target protein concentration (ng/mL) |                  |             |                  |                |              |    |
|---------------------------------|----------------------------------------|--------------|--------------------------------------|------------------|-------------|------------------|----------------|--------------|----|
|                                 |                                        |              | 100                                  | 250              | 500         | 1000             | 2000           |              |    |
| Bovine carbonic anhydrase       | DGPLTGTYR                              | 490.2/496.3  | %CV                                  | 42.4             | 7.2         | 15.9             | 9.6            | 3.8          |    |
|                                 |                                        |              | Calc. concentration <sup>b</sup>     | <b>103</b>       | <b>261</b>  | <b>610</b>       | <b>891</b>     | <b>1984</b>  |    |
|                                 |                                        |              | %relative error <sup>c</sup>         | 3.2              | 4.2         | 22.1             | 10.9           | 0.8          |    |
|                                 |                                        |              |                                      | S/N <sup>d</sup> | 4           | 7                | 12             | 17           | 21 |
|                                 | DFPIANGER                              | 509.7/378.3  | %CV                                  |                  |             |                  | 4.3            | 2.9          |    |
|                                 |                                        |              | Calc. concentration                  |                  |             |                  | <b>742</b>     | <b>1449</b>  |    |
| %relative error                 |                                        |              |                                      |                  |             | 34.8             | 38.0           |              |    |
|                                 |                                        |              | S/N                                  |                  |             | < 3 <sup>e</sup> | 12             | 10           |    |
| Bovine beta-lactoglobulin       | VLVLDTDYKK                             | 597.3/981.5  | %CV                                  | 2.5              | 7.9         | 36.1             | 25.8           | 9.6          |    |
|                                 |                                        |              | Calc. concentration                  | <b>725</b>       | <b>1098</b> | <b>1369</b>      | <b>3377</b>    | <b>5770</b>  |    |
|                                 |                                        |              | %relative error                      | 625.2            | 339.1       | 173.7            | 237.7          | 188.5        |    |
|                                 |                                        |              |                                      | S/N              | 5           | 12               | 15             | 21           | 34 |
|                                 | VYVEELKPTPEGDLEILLQK                   | 771.8/1026.1 | %CV                                  | 31.7             | 38.9        | 46.7             | 35.8           | 18.1         |    |
|                                 |                                        |              | Calc. concentration                  | <b>495</b>       | <b>1781</b> | <b>2490</b>      | <b>7539</b>    | <b>12893</b> |    |
| %relative error                 |                                        |              | n/a                                  | n/a              | n/a         | n/a              | n/a            |              |    |
|                                 |                                        |              | S/N                                  | 6                | 6           | 10               | 27             | 150          |    |
| Prostate-specific antigen (PSA) | IVGGWEC <sub>cam</sub> EK <sup>a</sup> | 539.2/865.3  | %CV                                  |                  |             | 12.7             | 7.3            | 7.0          |    |
|                                 |                                        |              | Calc. concentration                  |                  |             | <b>656</b>       | <b>1039</b>    | <b>2473</b>  |    |
|                                 |                                        |              | %relative error                      |                  |             | 31.2             | 3.9            | 23.6         |    |
|                                 |                                        |              |                                      | S/N              |             |                  | 3 <sup>e</sup> | 41           | 62 |
|                                 | LSEPAELTDAVK                           | 636.8/943.5  | %CV                                  |                  | 16.7        | 24.9             | 23.7           | 12.6         |    |
|                                 |                                        |              | Calc. concentration                  |                  | <b>104</b>  | <b>308</b>       | <b>511</b>     | <b>1136</b>  |    |
| %relative error                 |                                        |              |                                      | 58.3             | 38.5        | 48.9             | 43.2           |              |    |
|                                 |                                        |              | S/N                                  | < 3              | 7           | 8                | 10             | 30           |    |

<sup>a</sup> Cysteine were synthesized as carbamidomethyl cysteine.

<sup>b</sup> The formula for obtaining calculated concentrations is described in **Supplemental Methods**.

<sup>c</sup> %relative error = (|target ng/mL – calculated ng/mL| / |target ng/mL|) × 100.

<sup>d</sup> Average S/N for 3 SRM measurements.

<sup>e</sup> Large co-eluting interference.

**Table S2.** Quantitative direct PRISM-SRM measurements of 3 target proteins in human female serum. For the target protein concentration at 2.5 ng/mL three process replicates followed by three injection replicates for SRM measurement were used to test reproducibility of the PRISM workflow. For other concentration points only three SRM injection replicates were performed without any process replicate.

| Target protein                  | Surrogate peptide                      | Transition   | Target protein concentration (ng/mL) |             |             |             |             |                  |             |             |             |              |
|---------------------------------|----------------------------------------|--------------|--------------------------------------|-------------|-------------|-------------|-------------|------------------|-------------|-------------|-------------|--------------|
|                                 |                                        |              | 0                                    | 0.1         | 0.3         | 0.5         | 1           | 2.5 <sup>e</sup> | 5           | 10          | 100         |              |
| Bovine carbonic anhydrase       | DGPLTGTYR                              | 490.2/496.3  | %CV                                  |             |             |             |             | 8.0              | 7.9         | 4.3         | 6.2         | 4.9          |
|                                 |                                        |              | Calc. concentration <sup>b</sup>     |             |             |             |             | <b>2.6</b>       | <b>3.7</b>  | <b>8.4</b>  | <b>13.3</b> | <b>90.4</b>  |
|                                 | %relative error <sup>c</sup>           |              |                                      |             |             | 155.9       | 46.6        | 68.1             | 33.3        | 9.6         |             |              |
|                                 | S/N <sup>d</sup>                       | < 3          | < 3                                  | < 3         |             | 3           | 3           | 11               | 15          | 78          |             |              |
| Bovine beta-lactoglobulin       | DFPIANGER                              | 509.7/378.3  | %CV                                  |             | 11.8        | 20.7        | 15.0        | 5.1              | 5.9         | 8.7         | 1.6         |              |
|                                 |                                        |              | Calc. concentration                  |             | <b>0.50</b> | <b>0.54</b> | <b>0.78</b> | <b>1.6</b>       | <b>4.5</b>  | <b>5.6</b>  | <b>83.1</b> |              |
|                                 | %relative error                        |              | 68.2                                 | 8.1         | 22.0        | 34.6        | 9.6         | 43.8             | 16.9        |             |             |              |
|                                 | S/N                                    | < 3          | 8                                    | 10          | 17          | 17          | 18          | 25               | 281         |             |             |              |
| Bovine beta-lactoglobulin       | VLVLDTDYKK                             | 597.3/981.5  | %CV                                  | 17.8        | 17.4        | 5.4         | 8.9         | 1.7              | 7.3         | 7.0         | 9.5         | 4.5          |
|                                 |                                        |              | Calc. concentration                  | <b>23.0</b> | <b>21.8</b> | <b>24.3</b> | <b>17.1</b> | <b>26.4</b>      | <b>23.8</b> | <b>35.5</b> | <b>45.2</b> | <b>325</b>   |
|                                 | %relative error                        |              | 21666                                | 7999        | 3314        | 2540        | 859         | 611              | 352         | 225         |             |              |
|                                 | S/N                                    | 5            | 89                                   | 131         | 75          | 24          | 83          | 172              | 116         | 1232        |             |              |
| Bovine beta-lactoglobulin       | VYVEELKPTPEGD<br>LEILLQK               | 771.8/1026.1 | %CV                                  | 8.4         | 29.6        | 44.1        | 35.1        | 15.7             | 15.0        | 19.3        | 8.4         | 3.3          |
|                                 |                                        |              | Calc. concentration                  | <b>2839</b> | <b>2896</b> | <b>2790</b> | <b>2891</b> | <b>3199</b>      | <b>3158</b> | <b>3611</b> | <b>8622</b> | <b>46490</b> |
|                                 | %relative error                        |              | n/a                                  | n/a         | n/a         | n/a         | n/a         | n/a              | n/a         | n/a         |             |              |
|                                 | S/N                                    | 35           | 28                                   | 29          | 26          | 136         | 35          | 60               | 33          | 111         |             |              |
| Prostate-specific antigen (PSA) | IVGGWEC <sup>cam</sup> EK <sup>a</sup> | 539.2/865.3  | %CV                                  |             | 31.5        | 20.7        | 5.4         | 9.7              | 10.7        | 14.3        | 8.0         | 0.8          |
|                                 |                                        |              | Calc. concentration                  |             | <b>0.62</b> | <b>0.80</b> | <b>0.82</b> | <b>1.3</b>       | <b>2.5</b>  | <b>5.6</b>  | <b>8.5</b>  | <b>106.0</b> |
|                                 | %relative error                        |              | 520.8                                | 168.1       | 64.5        | 30.3        | 1.42        | 12.0             | 15.3        | 6.0         |             |              |
|                                 | S/N                                    | < 3          | 4                                    | 6           | 13          | 12          | 26          | 33               | 166         | 186         |             |              |
| Prostate-specific antigen (PSA) | LSEPAELTDAVK                           | 636.8/943.5  | %CV                                  |             |             | 27.1        | 19.2        | 14.4             | 14.3        | 8.5         | 7.7         | 0.8          |
|                                 |                                        |              | Calc. concentration                  |             | <b>0.60</b> | <b>0.71</b> | <b>1.2</b>  | <b>2.7</b>       | <b>4.4</b>  | <b>7.1</b>  | <b>93.4</b> |              |
|                                 | %relative error                        |              | 99.6                                 | 42.4        | 15.6        | 9.4         | 12.5        | 28.9             | 6.6         |             |             |              |
|                                 | S/N                                    | < 3          | 5                                    | 13          | 13          | 31          | 37          | 45               | 188         |             |             |              |

<sup>a</sup> Cysteine were synthesized as carbamidomethyl cysteine.

<sup>b</sup> The formula for obtaining calculated concentrations is described in **Supplemental Methods**.

<sup>c</sup> %relative error = (|target ng/mL – calculated ng/mL| / |target ng/mL|) × 100.

<sup>d</sup> Average S/N for 3 SRM measurements with the exception of 9 SRM measurements for the concentration point at 2.5 ng/mL.

<sup>e</sup> Three PRISM process replicates followed by three SRM injection replicates

A

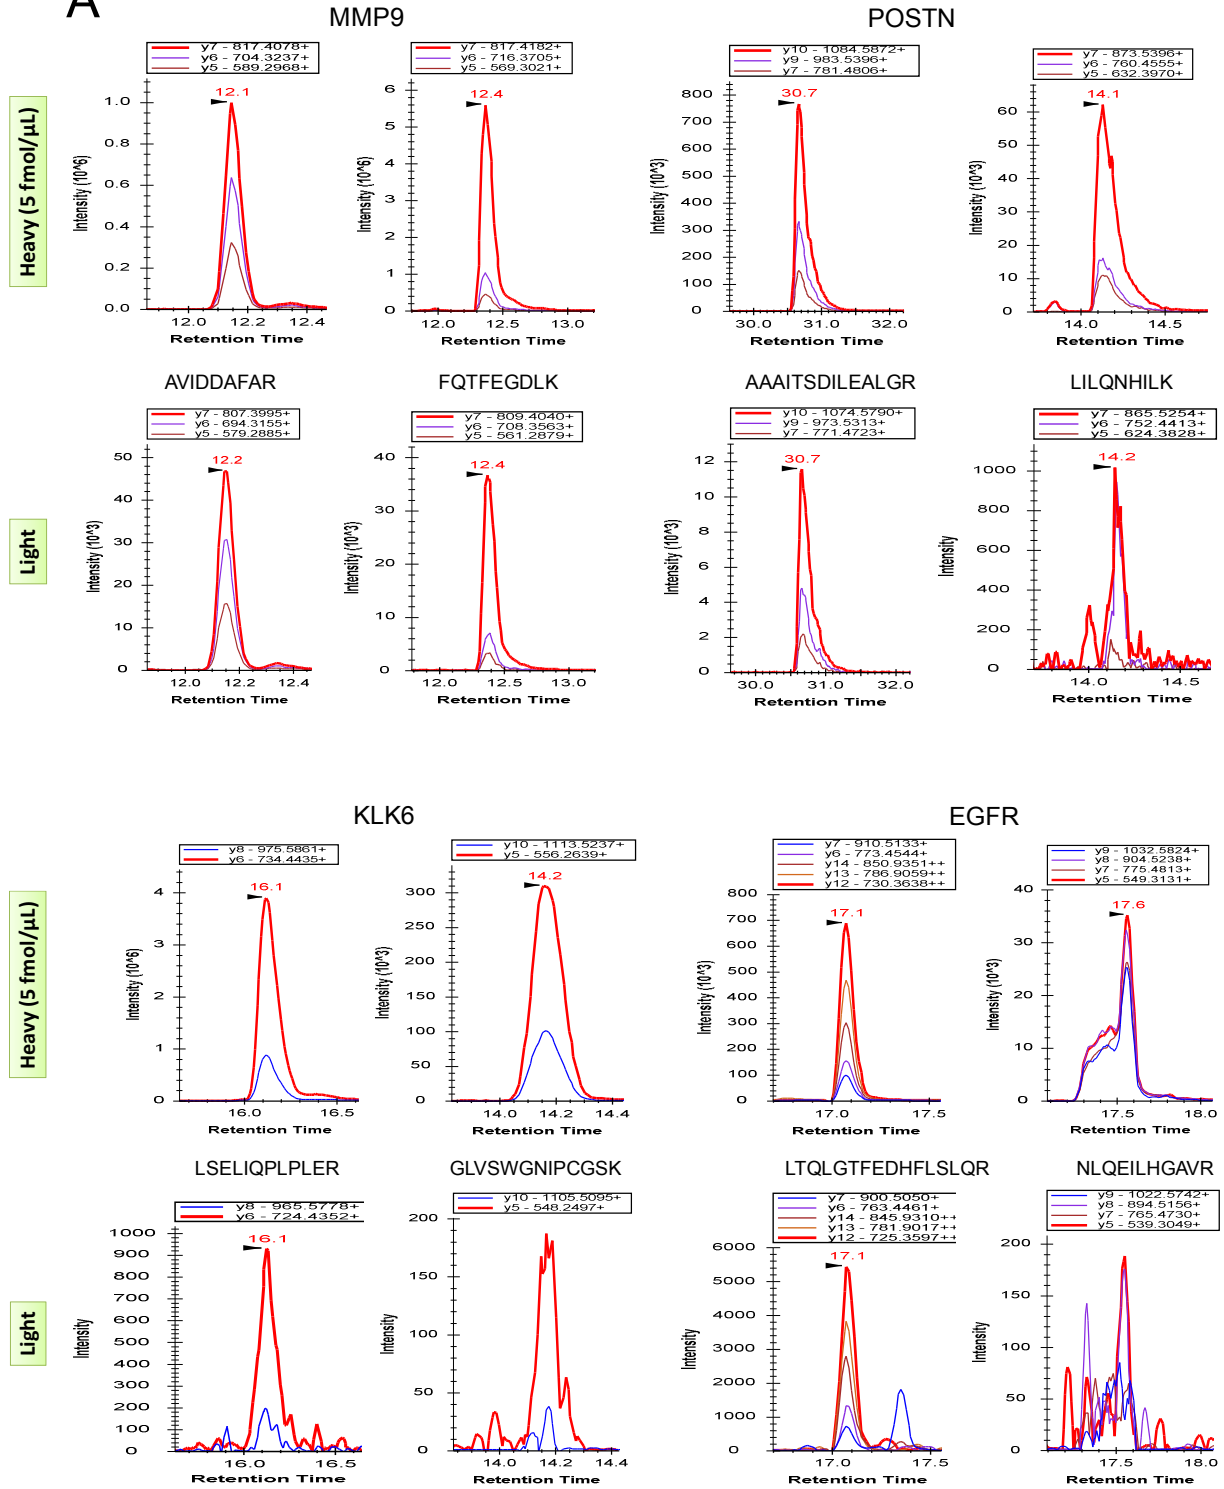

cTnT

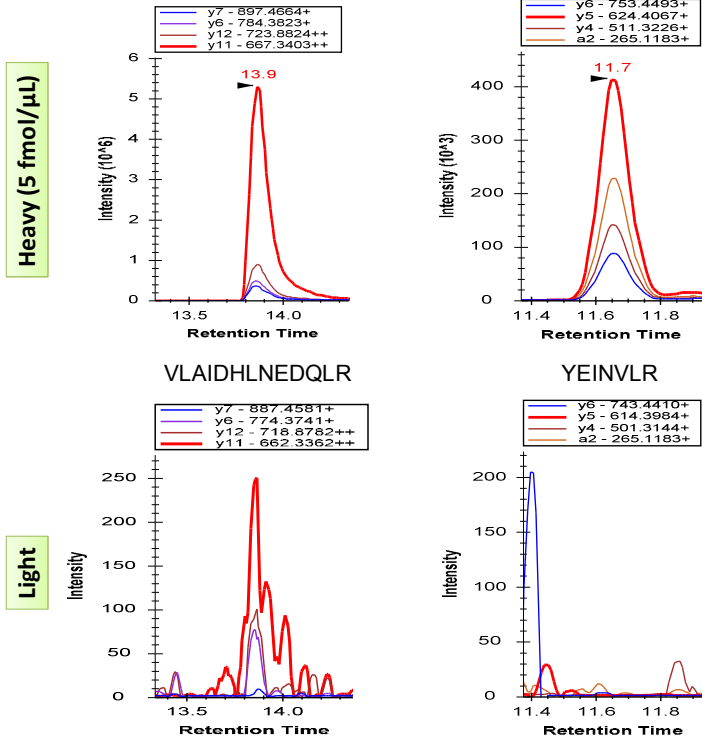

**B**

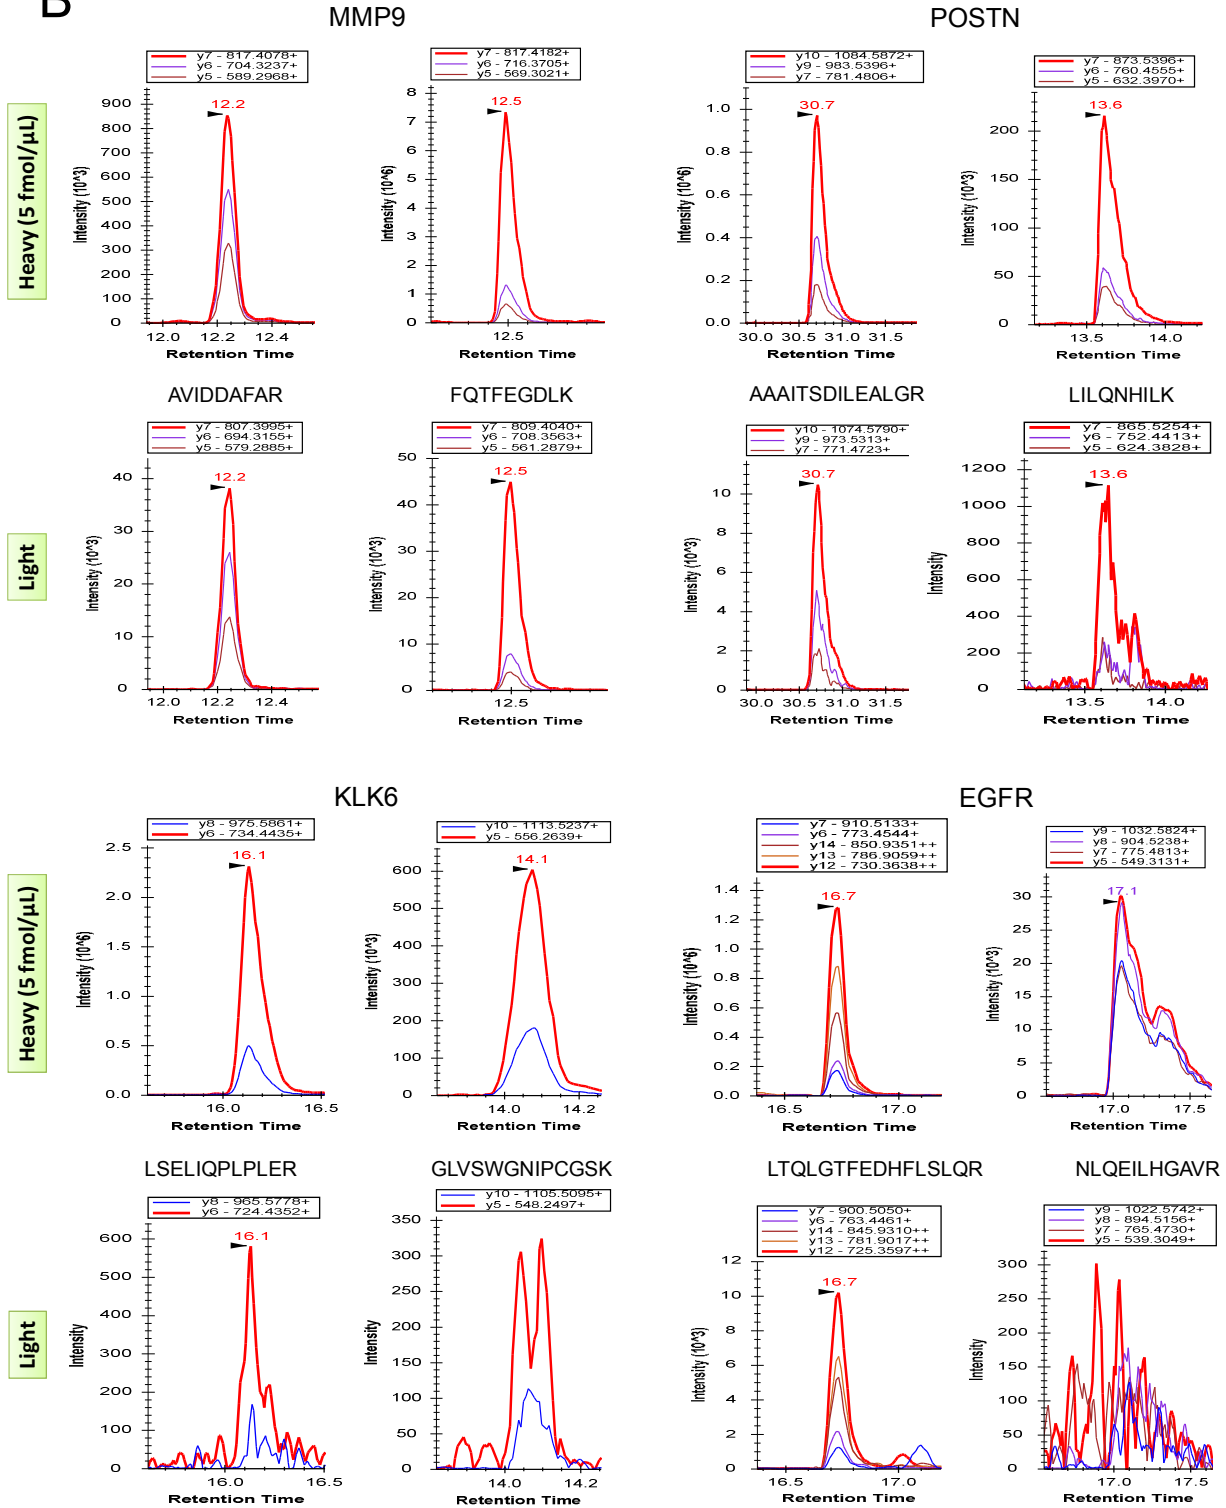

cTnT

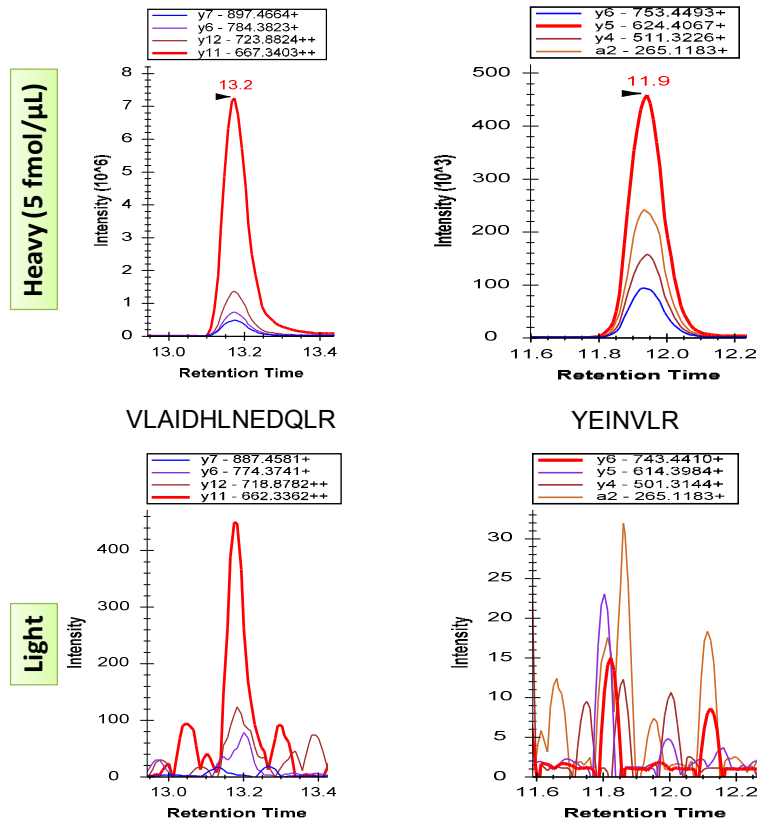

**Figure S8.** Extracted ion chromatograms of transitions monitored for quantification of endogenous proteins in human serum. **(A)** Direct PRISM-SRM measurements for clinical patient serum (Sample ID: 21). **(B)** Direct PRISM-SRM measurements for clinical patient serum (Sample ID: 6). Crude heavy peptides were used as internal standards with the spiking level at 5 fmol/μL in patient sera.



**Table S3.** The calculated six cancer-associated endogenous protein concentrations in the two clinical serum samples (see **Supplemental Methods: 2. endogenous protein concentration calculation in blinded clinical patient sera**).

| Endogenous protein | Accession number | Molecular weight (kDa) | Surrogate peptide (best transition)                     | Heavy peptide concentration (fmol/ $\mu$ L) | L/H <sup>c</sup>      | Calculated protein concentration (ng/mL) |                    |
|--------------------|------------------|------------------------|---------------------------------------------------------|---------------------------------------------|-----------------------|------------------------------------------|--------------------|
| cTnT               | P45379           | 34                     | VLAIHDLNEDQLR<br>(512.6/662.3)                          | 5                                           | 0.000054 <sup>d</sup> | 0.85 <sup>d</sup>                        | 0.17 <sup>d</sup>  |
|                    |                  |                        |                                                         |                                             | 0.000046 <sup>e</sup> | 0.91 <sup>e</sup>                        | 0.18 <sup>e</sup>  |
| KLK6               | Q92876           | 26.9                   | LSELIQPLPLER<br>(704.4/724.4)                           | 5                                           | 0.000205 <sup>d</sup> | 2.5 <sup>d</sup>                         | 0.5 <sup>d</sup>   |
|                    |                  |                        |                                                         |                                             | 0.000212 <sup>e</sup> | 3.3 <sup>e</sup>                         | 0.66 <sup>e</sup>  |
| PSA                | P07288           | 30                     | IVGGWEC <sub>cam</sub> EK <sup>a</sup><br>(539.2/865.3) | 0.5 <sup>b</sup>                            | 0.051679 <sup>d</sup> | 71.6 <sup>d</sup>                        |                    |
|                    |                  |                        |                                                         |                                             | 0.004028 <sup>e</sup> | 7.0 <sup>e</sup>                         |                    |
| EGFR               | P00533           | 134.3                  | LTQLGTFEDHFLSLQR<br>(635.7/725.4)                       | 5                                           | 0.008395 <sup>d</sup> | 520.5 <sup>d</sup>                       | 104.1 <sup>d</sup> |
|                    |                  |                        |                                                         |                                             | 0.0076 <sup>e</sup>   | 590.0 <sup>e</sup>                       | 118.0 <sup>e</sup> |
| MMP9               | P14780           | 78.5                   | AVIDDAFAR<br>(489.3/807.4)                              | 5                                           | 0.043311 <sup>d</sup> | 1569.7 <sup>d</sup>                      | 313.9 <sup>d</sup> |
|                    |                  |                        |                                                         |                                             | 0.048864 <sup>e</sup> | 2217.2 <sup>e</sup>                      | 443.4 <sup>e</sup> |
| POSTN              | Q15063           | 87                     | AAAITSDILEALGR<br>(700.9/1074.6)                        | 5                                           | 0.011428 <sup>d</sup> | 459.0 <sup>d</sup>                       | 91.8 <sup>d</sup>  |
|                    |                  |                        |                                                         |                                             | 0.016037 <sup>e</sup> | 806.5 <sup>e</sup>                       | 161.3 <sup>e</sup> |

<sup>a</sup> Cysteine were synthesized as carbamidomethyl cysteine.

<sup>b</sup> Besides PSA with pure heavy internal standards for the other five proteins crude heavy surrogate peptides were used as internal standards.

<sup>c</sup> Average L/H for 2 SRM measurements.

<sup>d</sup> Clinical patient sample from JHU (sample ID: 6).

<sup>e</sup> Clinical patient sample from JHU (sample ID: 21).

<sup>f</sup> Based on our experimental results (not published) the purity of crude peptides is around 20% . The detailed calculation can be found in Supplemental Material from the paper “Antibody-free, targeted mass-spectrometric approach for quantification of proteins at low picogram per milliliter levels in human plasma/serum. *Proc Natl Acad Sci U S A* 109, 15395-15400”.

A

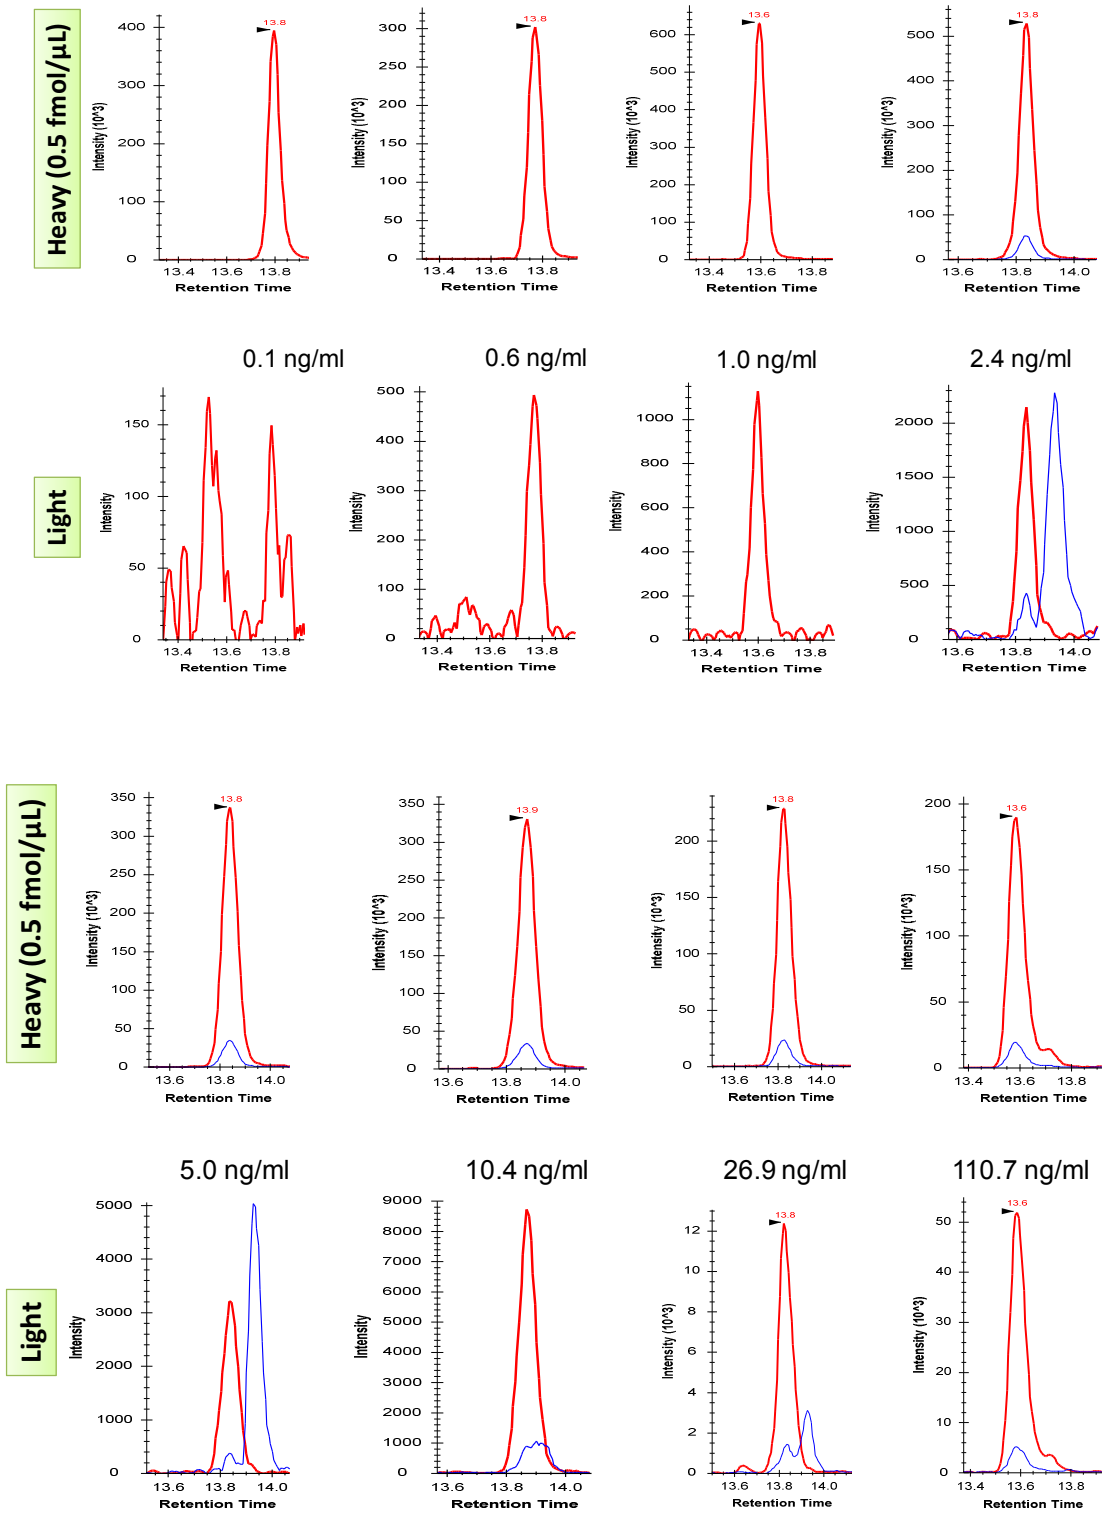

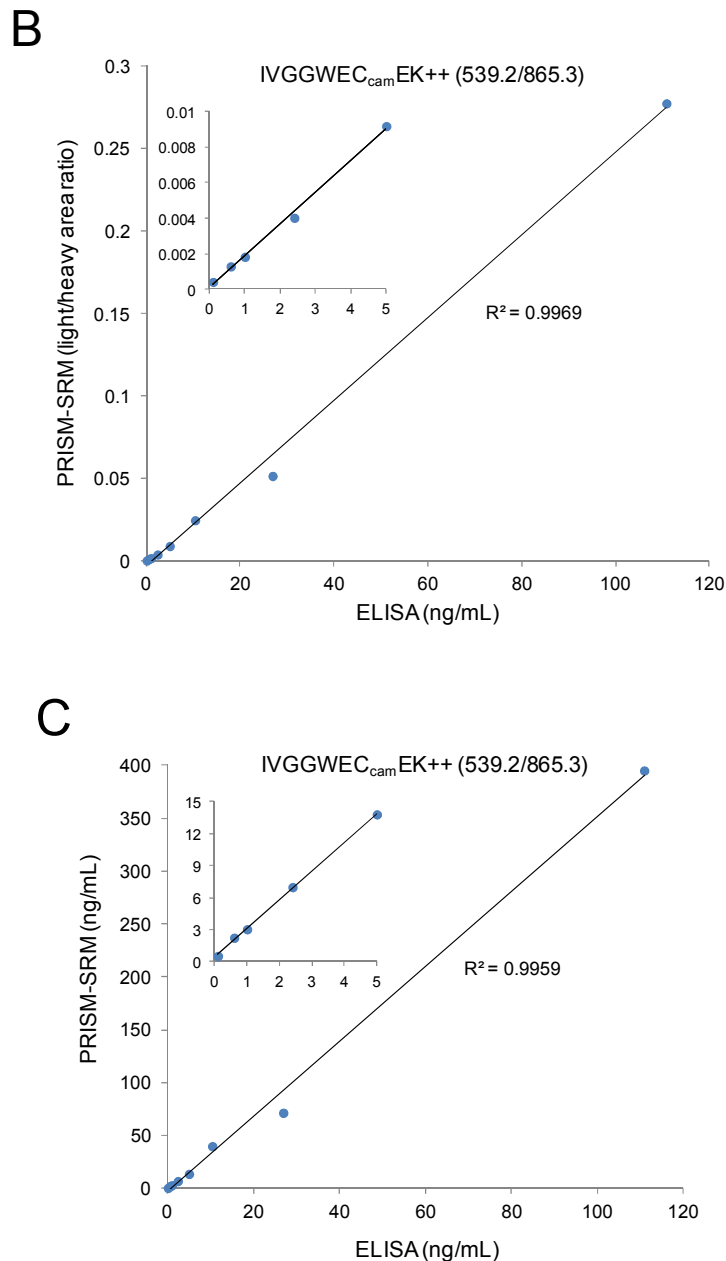

**Figure S9.** Direct PRISM-SRM versus ELISA for quantification of PSA in clinical patient samples. **(A)** XICs of transitions monitored for IVGGWEC<sub>cam</sub>EK derived from PSA along with internal standard at 0.5 fmol/ $\mu$ L. IVGGWEC<sub>cam</sub>EK: 539.2/865.3 (*red*), 539.2/964.4 (*blue*). PSA concentrations were obtained from the ELISA measurement. **(B)** Correlation curve between PRISM-SRM and ELISA measurements for PSA in patient serum. **(C)** Correlation curve between the calculated PSA concentrations based on the PRISM-SRM measurement and the ELISA values. Inset plots show the details of the low concentration range.

A

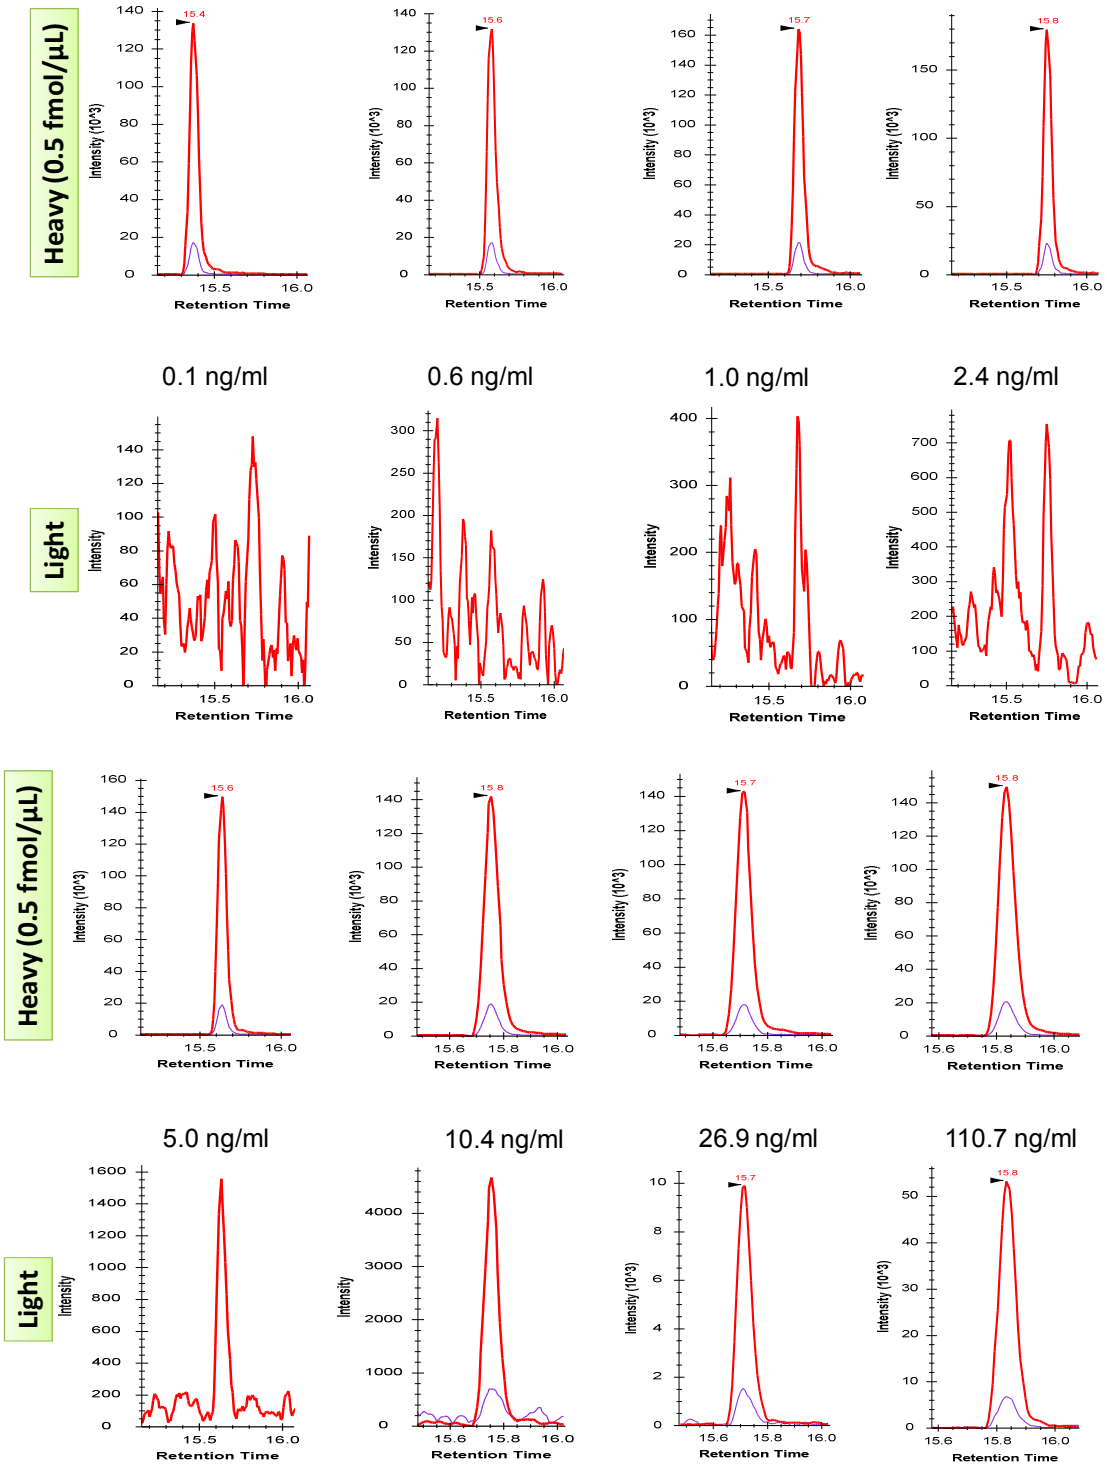

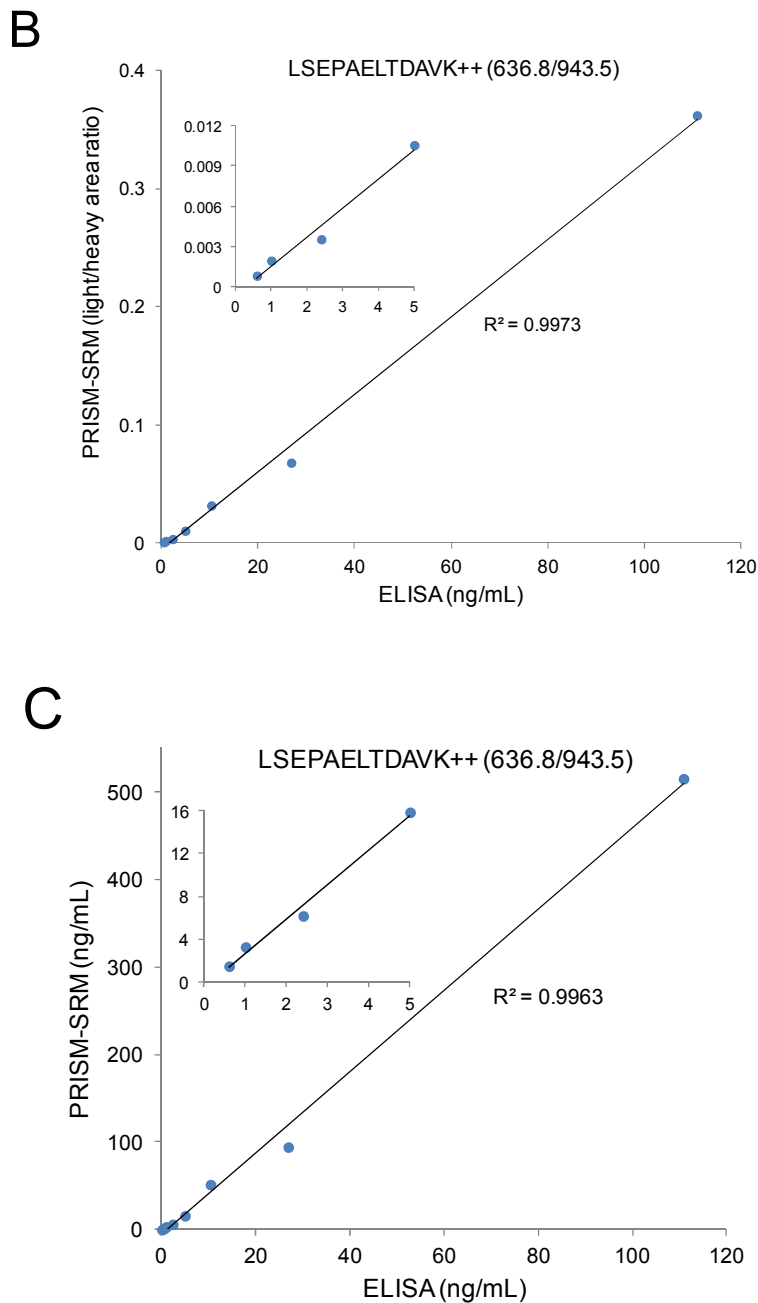

**Figure S10.** Direct PRISM-SRM versus ELISA for quantification of PSA in clinical patient samples. **(A)** XICs of transitions monitored for LSEPAELTDAVK derived from PSA along with internal standard at 0.5 fmol/ $\mu$ L. LSEPAELTDAVK: 636.8/943.5 (*red*), 636.8/846.5 (*purple*). PSA concentrations were obtained from the ELISA measurement. **(B)** Correlation curve between PRISM-SRM and ELISA measurements for PSA in patient serum. **(C)** Correlation curve between the calculated PSA concentrations based on the PRISM-SRM measurement and the ELISA values. Inset plots show the details of the low concentration range.

**Table S4.** Results of quantitative measurements from PRISM-SRM and ELISA.

| Sample ID                               | 6        | 13       | 20       | 21       | 23       | 29       | 30       | 33       |
|-----------------------------------------|----------|----------|----------|----------|----------|----------|----------|----------|
| ELISA (ng/mL)                           | 26.9     | 5        | 10.4     | 2.4      | 0.6      | 110.8    | 0.1      | 1        |
| PRISM-SRM<br>(L/H ratio)                | 0.051679 | 0.009178 | 0.024814 | 0.004028 | 0.001301 | 0.277614 | 0.000428 | 0.001838 |
| Calculated PSA<br>concentration (ng/mL) | 71.6     | 13.8     | 40.0     | 7.0      | 2.2      | 395.1    | 0.5      | 3.0      |

## Supplemental Methods

### 1. Target protein concentration calculation

The detailed calculation, including digestion efficiency and SPE recovery, can be found in Supplemental Material from the paper “Antibody-free, targeted mass-spectrometric approach for quantification of proteins at low picogram per milliliter levels in human plasma/serum. *Proc Natl Acad Sci U S A* 109, 15395-15400”.

### 2. Endogenous protein concentration calculation in blinded clinical patient sera

The detailed calculation, including digestion efficiency and SPE recovery, can be found in Supplemental Material from the paper “Antibody-free, targeted mass-spectrometric approach for quantification of proteins at low picogram per milliliter levels in human plasma/serum. *Proc Natl Acad Sci U S A* 109, 15395-15400”.

### 3. Volume of raw female serum required for PRISM-SRM experiment

$$V_{\text{loading volume}} = 45 \mu\text{L (PRISM fractionation at a concentration of } 1 \mu\text{g}/\mu\text{L)}$$

$$V_{total\ raw\ female\ serum} = 12.4\ \mu\text{L}\ (1\ \text{mg}\ \text{female}\ \text{serum})$$

Following trypsin digestion and SPE cleanup, the peptide recovery is ~33%, which means that the amount of total peptide is 330  $\mu\text{g}$ , i.e., the total volume will be 330  $\mu\text{L}$  with the peptide concentration at 1  $\mu\text{g}/\mu\text{L}$ .

$$V_{raw\ female\ serum}\ (\text{direct}\ \text{PRISM-SRM}) = 45\ \mu\text{L} \times 12.4\ \mu\text{L}/330\ \mu\text{L} = 1.69\ \mu\text{l} = \sim 2\ \mu\text{L}$$

#### **4. On-column calculation of injected target protein**

The detailed calculation can be found in Supplemental Material from the paper “Antibody-free, targeted mass-spectrometric approach for quantification of proteins at low picogram per milliliter levels in human plasma/serum. *Proc Natl Acad Sci U S A* 109, 15395-15400”.

#### **5. Coefficient of variation (CV) calculation**

Precision was determined by CV (standard derivation divided by the mean) and expressed as a percentage. The concentration point at 2.5 ng/mL involved three process replicates. The mean value of the three process replicates was obtained from three average L/H area ratio values, and each average L/H value was based on three injection replicates per process replicate. The standard deviation was calculated with the three average L/H values and their mean value. For the other concentration points, CV calculation was simply based on three injection replicates of LC-SRM measurements.
